# Supplementary material for: Advancing carbon dioxide capture: investigation into the kinetics and efficiency of absorption in molten calcium oxide–chloride
Source: Royal Society of Chemistry journal article supplement (doi:10.1039/d4su00354c), 2024-10-24
Supplement: d4su00354c1.xlsx [file d4su00354c1.xlsx]

## Sheet: 10cm height
10cm		Ideal gas law	mol/min	mol/min				mol/min	Moles CO2	mol/min	0.392699	mol/L	Partial pressure		mol		Oxide concentration
Time (mins)	CO2 (vol%)	Molar fraction	Total molar flow out	CO2 moles exiting	CO2 entering vol%	Co2 absorbed (vol%)	Molar fraction	Moles being absorbed	Moles in solution	Rate of absorption	Molten salt vol (L)	CO2 concentration	CO2 partial pressure	CaO moles	CaO molar change	O2-	Predicted rate	Error
2.06925	0.127419	0.00127419	0.00681001	8.67725e-06	14	13.8726	0.138726	0.000944724	0.00195487	0.000944724	0.19635	0.00995606	0.138726	0.606212	0.604257	3.07746	0.000973019	8.00623
3.39321	0.303393	0.00303393		2.06611e-05		13.6966	0.136966	0.00093274	0.00318978	0.00093274		0.0162454	0.136966		0.603022	3.07117	0.000958713	6.74598
6.58683	0.606907	0.00606907		4.13304e-05		13.3931	0.133931	0.000912071	0.00610258	0.000912071		0.0310802	0.133931		0.60011	3.05633	0.00093294	4.35522
9.3014	0.843157	0.00843157		5.74191e-05		13.1568	0.131568	0.000895982	0.00853479	0.000895982		0.0434673	0.131568		0.597677	3.04395	0.000912769	2.8179
12.1756	1.0926	0.010926		7.44063e-05		12.9074	0.129074	0.000878995	0.0110612	0.000878995		0.0563345	0.129074		0.595151	3.03108	0.000891678	1.60861
14.9367	1.39413	0.0139413		9.49405e-05		12.6059	0.126059	0.000858461	0.0134315	0.000858461		0.0684062	0.126059		0.592781	3.01901	0.000867379	0.7954
20.259	1.89841	0.0189841		0.000129282		12.1016	0.121016	0.000824119	0.0178177	0.000824119		0.0907449	0.121016		0.588394	2.99667	0.00082652	0.0576221
24.6421	2.37834	0.0237834		0.000161965		11.6217	0.116217	0.000791436	0.0212866	0.000791436		0.108412	0.116217		0.584926	2.979	0.000789062	0.0563716
28.399	2.93739	0.0293739		0.000200036		11.0626	0.110626	0.000753365	0.0241169	0.000753365		0.122827	0.110626		0.582095	2.96459	0.00074747	0.347448
32.1558	3.44891	0.0344891		0.000234871		10.5511	0.105511	0.00071853	0.0268164	0.00071853		0.136575	0.105511		0.579396	2.95084	0.000709602	0.797092
35.9127	3.95251	0.0395251		0.000269166		10.0475	0.100475	0.000684235	0.029387	0.000684235		0.149667	0.100475		0.576825	2.93775	0.000672735	1.32247
39.9827	4.51897	0.0451897		0.000307742		9.48103	0.0948103	0.000645659	0.0320148	0.000645659		0.16305	0.0948103		0.574197	2.92436	0.000631916	1.88884
43.7396	5.04373	0.0504373		0.000343478		8.95627	0.0895627	0.000609923	0.0343062	0.000609923		0.17472	0.0895627		0.571906	2.91269	0.000594558	2.36083
47.1834	5.55441	0.0555441		0.000378256		8.44559	0.0844559	0.000575145	0.0362869	0.000575145		0.184808	0.0844559		0.569925	2.90261	0.000558715	2.69966
50.6272	6.11421	0.0611421		0.000416378		7.88579	0.0788579	0.000537023	0.0381363	0.000537023		0.194227	0.0788579		0.568076	2.89319	0.000519989	2.90172
54.0711	6.64865	0.0664865		0.000452774		7.35135	0.0735135	0.000500627	0.0398604	0.000500627		0.203007	0.0735135		0.566352	2.88441	0.000483276	3.01062
57.5149	7.16092	0.0716092		0.000487659		6.83908	0.0683908	0.000465742	0.0414643	0.000465742		0.211176	0.0683908		0.564748	2.87624	0.000448327	3.03294
60.9587	7.66632	0.0766632		0.000522077		6.33368	0.0633368	0.000431324	0.0429497	0.000431324		0.218741	0.0633368		0.563262	2.86867	0.000414104	2.96542
64.7156	8.23461	0.0823461		0.000560778		5.76539	0.0576539	0.000392623	0.0444248	0.000392623		0.226253	0.0576539		0.561787	2.86116	0.000375961	2.77637
68.4725	8.80951	0.0880951		0.000599928		5.19049	0.0519049	0.000353473	0.0457527	0.000353473		0.233017	0.0519049		0.560459	2.8544	0.000337672	2.49672
72.5425	9.372	0.09372		0.000638234		4.628	0.04628	0.000315167	0.0470354	0.000315167		0.23955	0.04628		0.559177	2.84786	0.000300389	2.18382
76.6124	9.89206	0.0989206		0.00067365		4.10794	0.0410794	0.000279751	0.048174	0.000279751		0.245348	0.0410794		0.558038	2.84206	0.000266091	1.86597
80.6824	10.3816	0.103816		0.000706985		3.61844	0.0361844	0.000246416	0.0491769	0.000246416		0.250456	0.0361844		0.557035	2.83696	0.000233963	1.55091
85.0655	10.8847	0.108847		0.000741248		3.11531	0.0311531	0.000212153	0.0501068	0.000212153		0.255192	0.0311531		0.556105	2.83222	0.000201095	1.22284
90.0747	11.4124	0.114124		0.000777188		2.58757	0.0258757	0.000176214	0.0509895	0.000176214		0.259687	0.0258757		0.555223	2.82773	0.000166764	0.89303
96.3361	11.9302	0.119302		0.000812449		2.06979	0.0206979	0.000140953	0.0518721	0.000140953		0.264182	0.0206979		0.55434	2.82323	0.000133182	0.603898
103.224	12.4325	0.124325		0.000846653		1.56751	0.0156751	0.000106748	0.0526073	0.000106748		0.267927	0.0156751		0.553605	2.81949	0.000100729	0.362291
110.111	12.8203	0.128203		0.00087306		1.17975	0.0117975	8.03408e-05	0.0531607	8.03408e-05		0.270745	0.0117975		0.553051	2.81667	7.57349e-05	0.212139
116.999	13.1648	0.131648		0.000896525		0.835186	0.00835186	5.68763e-05	0.0535524	5.68763e-05		0.27274	0.00835186		0.55266	2.81467	5.35776e-05	0.10881		k1	0.00113957							Initial CaO conc		wt%	5.32
123.887	13.4057	0.134057		0.000912927		0.59433	0.0059433	4.04739e-05	0.0538312	4.04739e-05		0.27416	0.0059433		0.552381	2.81325	3.81074e-05	0.0560073		k2	0.00113957									Mixture mass	639	g
130.774	13.586	0.13586		0.00092521		0.413967	0.00413967	2.81912e-05	0.0540254	2.81912e-05		0.275149	0.00413967		0.552187	2.81226	2.65335e-05	0.0274805		Initial CaO	3.08741	mol/l								Mass CaO	33.9948	g
137.662	13.7145	0.137145		0.000933962		0.285456	0.00285456	1.94396e-05	0.0541592	1.94396e-05		0.275831	0.00285456		0.552053	2.81158	1.8292e-05	0.0131684												CaO Molar mass	56.0774	g/mol
144.55	13.8171	0.138171		0.000940948		0.18287	0.0018287	1.24535e-05	0.054245	1.24535e-05		0.276268	0.0018287		0.551967	2.81115	1.17165e-05	0.00543113			0.00227915									Moles CaO	0.606212	moles
147.904	13.901	0.13901		0.000946662		0.0989536	0.000989536	6.73875e-06	0.0542676	6.73875e-06		0.276383	0.000989536		0.551944	2.81103	6.33971e-06	0.00159233												Salt height	10	cm
149.872	13.6897	0.136897		0.000932273		0.310252	0.00310252	2.11282e-05	0.0543092	2.11282e-05		0.276595	0.00310252		0.551903	2.81082	1.98756e-05													Inner D	5	cm
150.299	13.356	0.13356		0.000909542		0.644045	0.00644045	4.38595e-05	0.054328	4.38595e-05		0.27669	0.00644045		0.551884	2.81072	4.12579e-05													Vol of salt	196.35	cm3
150.31	13.0402	0.130402		0.000888041		0.959768	0.00959768	6.53603e-05	0.0543287	6.53603e-05		0.276694	0.00959768		0.551883	2.81072	6.14831e-05													CaO conc	3.08741	conc
151.098	12.5682	0.125682		0.000855895		1.4318	0.014318	9.75059e-05	0.0544055	9.75059e-05		0.277085	0.014318		0.551807	2.81033	9.17091e-05
151.098	11.9015	0.119015		0.000810495		2.09847	0.0209847	0.000142906	0.0544055	#DIV/0!		0.277085	0.0209847		0.551807	2.81033	0.00013441
151.795	11.3735	0.113735		0.000774536		2.6265	0.026265	0.000178865	0.0545302	0.000178865		0.27772	0.026265		0.551682	2.80969	0.000168193
153.493	11.1746	0.111746		0.000760993		2.82538	0.0282538	0.000192409	0.0548569	0.000192409		0.279384	0.0282538		0.551355	2.80803	0.000180822
155.09	11.3567	0.113567		0.000773391		2.64332	0.0264332	0.00018001	0.0551443	0.00018001		0.280848	0.0264332		0.551068	2.80657	0.000169082
156.17	11.5954	0.115954		0.000789648		2.4046	0.024046	0.000163753	0.0553212	0.000163753		0.281748	0.024046		0.550891	2.80566	0.000153762
157.485	12.9328	0.129328		0.000880725		1.0672	0.010672	7.26763e-05	0.0554168	7.26763e-05		0.282235	0.010672		0.550795	2.80518	6.82304e-05
157.699	12.3997	0.123997		0.00084442		1.60031	0.0160031	0.000108981	0.05544	0.000108981		0.282354	0.0160031		0.550772	2.80506	0.00010231
158.146	13.5201	0.135201		0.000920721		0.479881	0.00479881	3.268e-05	0.0554547	3.268e-05		0.282428	0.00479881		0.550757	2.80498	3.06787e-05
158.283	13.9632	0.139632		0.000950897		0.0367749	0.000367749	2.50438e-06	0.055455	2.50438e-06		0.28243	0.000367749		0.550757	2.80498	2.35101e-06
158.638	14.3842	0.143842		0.000979567		-0.384228	-0.00384228	-2.6166e-05	0.0554457	-2.6166e-05		0.282383	-0.00384228		0.550766	2.80503	-2.4564e-05
158.638	14.8239	0.148239		0.00100951		-0.823885	-0.00823885	-5.61066e-05	0.0554457	#DIV/0!		0.282383	-0.00823885		0.550766	2.80503	-5.26716e-05
159.082	15.1149	0.151149		0.00102932		-1.11486	-0.0111486	-7.59221e-05	0.055412	-7.59221e-05		0.282211	-0.0111486		0.5508	2.8052	-7.12783e-05
159.499	15.4419	0.154419		0.0010516		-1.44191	-0.0144191	-9.81942e-05	0.0553711	-9.81942e-05		0.282003	-0.0144191		0.550841	2.80541	-9.21949e-05
159.577	16.1786	0.161786		0.00110177		-2.17864	-0.0217864	-0.000148366	0.0553595	-0.000148366		0.281943	-0.0217864		0.550853	2.80547	-0.000139304
159.88	15.8423	0.158423		0.00107886		-1.84225	-0.0184225	-0.000125458	0.0553214	-0.000125458		0.28175	-0.0184225		0.550891	2.80566	-0.000117803
160.203	16.5352	0.165352		0.00112605		-2.53522	-0.0253522	-0.000172649	0.0552657	-0.000172649		0.281466	-0.0253522		0.550946	2.80595	-0.000162131
160.651	17.2381	0.172381		0.00117391		-3.23806	-0.0323806	-0.000220512	0.055167	-0.000220512		0.280963	-0.0323806		0.551045	2.80645	-0.000207116
160.679	16.8727	0.168727		0.00114903		-2.87268	-0.0287268	-0.00019563	0.0551616	-0.00019563		0.280935	-0.0287268		0.551051	2.80648	-0.000183747
160.679	17.6606	0.176606		0.00120269		-3.66056	-0.0366056	-0.000249284	0.0551616	#DIV/0!		0.280935	-0.0366056		0.551051	2.80648	-0.000234143
161.143	18.0742	0.180742		0.00123085		-4.07416	-0.0407416	-0.00027745	0.0550328	-0.00027745		0.28028	-0.0407416		0.551179	2.80713	-0.000260659
161.143	18.5554	0.185554		0.00126362		-4.5554	-0.045554	-0.000310223	0.0550328	#DIV/0!		0.28028	-0.045554		0.551179	2.80713	-0.000291449
161.456	18.9357	0.189357		0.00128952		-4.93569	-0.0493569	-0.000336121	0.0549276	-0.000336121		0.279744	-0.0493569		0.551285	2.80767	-0.000315839
161.977	19.5141	0.195141		0.00132891		-5.51406	-0.0551406	-0.000375508	0.0547317	-0.000375508		0.278746	-0.0551406		0.55148	2.80867	-0.000352975
162.082	20.2033	0.202033		0.00137584		-6.20327	-0.0620327	-0.000422443	0.0546876	-0.000422443		0.278522	-0.0620327		0.551525	2.80889	-0.000397125
162.082	20.7419	0.207419		0.00141253		-6.74194	-0.0674194	-0.000459127	0.0546876	#DIV/0!		0.278522	-0.0674194		0.551525	2.80889	-0.000431611
163.074	21.5397	0.215397		0.00146686		-7.53971	-0.0753971	-0.000513455	0.0541782	-0.000513455		0.275927	-0.0753971		0.552034	2.81149	-0.000483128
163.178	21.2352	0.212352		0.00144612		-7.23524	-0.0723524	-0.00049272	0.0541271	-0.00049272		0.275667	-0.0723524		0.552085	2.81175	-0.000463662
163.647	22.1265	0.221265		0.00150682		-8.1265	-0.081265	-0.000553416	0.0538672	-0.000553416		0.274343	-0.081265		0.552345	2.81307	-0.000521022
163.872	22.5095	0.225095		0.0015329		-8.50953	-0.0850953	-0.000579499	0.0537368	-0.000579499		0.273679	-0.0850953		0.552475	2.81373	-0.000545708
164.408	22.8914	0.228914		0.0015589		-8.89135	-0.0889135	-0.000605502	0.0534127	-0.000605502		0.272029	-0.0889135		0.552799	2.81538	-0.000570529
164.671	23.2369	0.232369		0.00158244		-9.23692	-0.0923692	-0.000629035	0.0532472	-0.000629035		0.271186	-0.0923692		0.552965	2.81623	-0.00059288
164.671	23.7824	0.237824		0.00161958		-9.78237	-0.0978237	-0.000666181	0.0532472	#DIV/0!		0.271186	-0.0978237		0.552965	2.81623	-0.000627891
167.404	24.3551	0.243551		0.00165858		-10.3551	-0.103551	-0.000705181	0.0513196	-0.000705181		0.261369	-0.103551		0.554893	2.82604	-0.000666966
170.259	23.8438	0.238438		0.00162377		-9.84383	-0.0984383	-0.000670366	0.0494054	-0.000670366		0.25162	-0.0984383		0.556807	2.83579	-0.000636225
171.004	23.0901	0.230901		0.00157244		-9.09011	-0.0909011	-0.000619037	0.0489443	-0.000619037		0.249271	-0.0909011		0.557268	2.83814	-0.000587997
171.058	23.5409	0.235409		0.00160314		-9.54092	-0.0954092	-0.000649737	0.0489096	-0.000649737		0.249094	-0.0954092		0.557303	2.83832	-0.000617197
171.599	22.3737	0.223737		0.00152365		-8.37368	-0.0837368	-0.000570248	0.0486008	-0.000570248		0.247522	-0.0837368		0.557611	2.83989	-0.000541989
172.351	21.7702	0.217702		0.00148255		-7.77016	-0.0777016	-0.000529148	0.0482032	-0.000529148		0.245497	-0.0777016		0.558009	2.84192	-0.000503284
173.144	21.0684	0.210684		0.00143476		-7.06841	-0.0706841	-0.000481359	0.0478215	-0.000481359		0.243553	-0.0706841		0.558391	2.84386	-0.000458144
173.979	19.9437	0.199437		0.00135816		-5.94365	-0.0594365	-0.000404763	0.0474835	-0.000404763		0.241832	-0.0594365		0.558729	2.84558	-0.000385475
174.292	20.3754	0.203754		0.00138757		-6.37543	-0.0637543	-0.000434168	0.0473476	-0.000434168		0.241139	-0.0637543		0.558865	2.84627	-0.000413579
174.98	19.356	0.19356		0.00131815		-5.35601	-0.0535601	-0.000364745	0.0470964	-0.000364745		0.23986	-0.0535601		0.559116	2.84755	-0.000347605
175.544	18.7715	0.187715		0.00127834		-4.77147	-0.0477147	-0.000324938	0.0469133	-0.000324938		0.238927	-0.0477147		0.559299	2.84849	-0.000309769
176.662	17.9636	0.179636		0.00122332		-3.96362	-0.0396362	-0.000269923	0.0466115	-0.000269923		0.23739	-0.0396362		0.559601	2.85002	-0.000257462
177.422	17.1914	0.171914		0.00117073		-3.19137	-0.0319137	-0.000217333	0.0464462	-0.000217333		0.236549	-0.0319137		0.559766	2.85086	-0.00020736
177.986	16.5141	0.165141		0.00112461		-2.51415	-0.0251415	-0.000171214	0.0463497	-0.000171214		0.236057	-0.0251415		0.559862	2.85136	-0.000163386
178.831	15.7241	0.157241		0.00107081		-1.72408	-0.0172408	-0.00011741	0.0462505	-0.00011741		0.235552	-0.0172408		0.559962	2.85186	-0.000112062
179.614	15.2944	0.152944		0.00104155		-1.29445	-0.0129445	-8.81519e-05	0.0461815	-8.81519e-05		0.2352	-0.0129445		0.560031	2.85221	-8.41468e-05
180.419	14.5284	0.145284		0.000989387		-0.528422	-0.00528422	-3.59856e-05	0.0461525	-3.59856e-05		0.235053	-0.00528422		0.56006	2.85236	-3.43524e-05
181.179	13.8113	0.138113		0.000940553		0.188663	0.00188663	1.28479e-05	0.0461623	1.28479e-05		0.235103	0.00188663		0.56005	2.85231	1.22646e-05
182.119	13.1611	0.131611		0.000896271		0.838914	0.00838914	5.71301e-05	0.046216	5.71301e-05		0.235376	0.00838914		0.559996	2.85204	5.45311e-05
183.058	12.5996	0.125996		0.000858034		1.4004	0.014004	9.53676e-05	0.0463055	9.53676e-05		0.235832	0.014004		0.559907	2.85158	9.10146e-05
184.631	11.543	0.11543		0.000786078		2.45703	0.0245703	0.000167324	0.0465687	0.000167324		0.237172	0.0245703		0.559643	2.85024	0.000159611
185.562	10.9839	0.109839		0.000748007		3.01606	0.0301606	0.000205394	0.0467601	0.000205394		0.238147	0.0301606		0.559452	2.84927	0.00019586
186.606	10.2771	0.102771		0.00069987		3.72292	0.0372292	0.000253531	0.0470246	0.000253531		0.239495	0.0372292		0.559187	2.84792	0.000241648
187.879	9.63324	0.0963324		0.000656024		4.36676	0.0436676	0.000297377	0.0474033	0.000297377		0.241423	0.0436676		0.558809	2.84599	0.000283247
188.693	9.13667	0.0913667		0.000622208		4.86333	0.0486333	0.000331193	0.0476729	0.000331193		0.242796	0.0486333		0.558539	2.84462	0.000315304
190.572	8.47945	0.0847945		0.000577451		5.52055	0.0552055	0.00037595	0.0483791	0.00037595		0.246392	0.0552055		0.557833	2.84102	0.000357461
192.387	7.70419	0.0770419		0.000524656		6.29581	0.0629581	0.000428745	0.0491576	0.000428745		0.250358	0.0629581		0.557055	2.83706	0.000407091
193.765	7.10076	0.0710076		0.000483562		6.89924	0.0689924	0.000469839	0.0498048	0.000469839		0.253654	0.0689924		0.556407	2.83376	0.000445591
196.05	6.41251	0.0641251		0.000436692		7.58749	0.0758749	0.000516709	0.0509857	0.000516709		0.259668	0.0758749		0.555226	2.82774	0.000489002
197.772	5.84371	0.0584371		0.000397957		8.15629	0.0815629	0.000555444	0.0519421	0.000555444		0.264539	0.0815629		0.55427	2.82287	0.000524754
200.187	5.2511	0.052511		0.000357601		8.7489	0.087489	0.000595801	0.0533811	0.000595801		0.271868	0.087489		0.552831	2.81555	0.00056142
203.095	4.7007	0.047007		0.000320118		9.2993	0.092993	0.000633283	0.0552221	0.000633283		0.281244	0.092993		0.55099	2.80617	0.000594753
205.912	4.17473	0.0417473		0.000284299		9.82527	0.0982527	0.000669102	0.0571074	0.000669102		0.290846	0.0982527		0.549105	2.79657	0.000626242
209.356	3.63023	0.0363023		0.000247219		10.3698	0.103698	0.000706182	0.0595394	0.000706182		0.303232	0.103698		0.546673	2.78418	0.000658019
213.426	3.08878	0.0308878		0.000210346		10.9112	0.109112	0.000743055	0.0625636	0.000743055		0.318634	0.109112		0.543649	2.76878	0.000688548
218.122	2.58193	0.0258193		0.00017583		11.4181	0.114181	0.000777571	0.0662152	0.000777571		0.337231	0.114181		0.539997	2.75018	0.000715692
223.758	2.07421	0.0207421		0.000141254		11.9258	0.119258	0.000812147	0.0707919	0.000812147		0.36054	0.119258		0.53542	2.72687	0.000741181
230.332	1.61697	0.0161697		0.000110116		12.383	0.12383	0.000843285	0.0763361	0.000843285		0.388777	0.12383		0.529876	2.69864	0.000761629
237.22	1.2637	0.012637		8.60577e-05		12.7363	0.127363	0.000867343	0.0823101	0.000867343		0.419202	0.127363		0.523902	2.66821	0.000774526
244.107	0.988198	0.00988198		6.72964e-05		13.0118	0.130118	0.000886105	0.0884133	0.000886105		0.450285	0.130118		0.517799	2.63713	0.000782061
250.995	0.758071	0.00758071		5.16247e-05		13.2419	0.132419	0.000901777	0.0946244	0.000901777		0.481918	0.132419		0.511588	2.6055	0.000786346
257.883	0.568993	0.00568993		3.87485e-05		13.431	0.13431	0.000914653	0.100924	0.000914653		0.514003	0.13431		0.505288	2.57341	0.000787753
264.77	0.406273	0.00406273		2.76672e-05		13.5937	0.135937	0.000925734	0.1073	0.000925734		0.546476	0.135937		0.498912	2.54094	0.000787235
271.658	0.227734	0.00227734		1.55087e-05		13.7723	0.137723	0.000937893	0.11376	0.000937893		0.579376	0.137723		0.492452	2.50804	0.000787248
276.041	0.0597118	0.000597118		4.06638e-06		13.9403	0.139403	0.000949335	0.117921	0.000949335		0.600567	0.139403		0.488291	2.48685	0.000790119

## Sheet: 15cm height 
15cm		Ideal gas law	mol/min	mol/min				mol/min	Moles CO2	mol/min	0.392699	mol/L	Partial pressure		mol		Oxide concentration
Time (mins)	CO2 (vol%)	Molar fraction	Total molar flow out	CO2 moles exiting	CO2 entering vol%	Co2 absorbed (vol%)	Molar fraction	Moles being absorbed	Moles in solution	Rate of absorption	Molten salt vol (L)	CO2 concentration	CO2 partial pressure	CaO moles	CaO molar change	O2-	Predicted rate	Error
3.30787	0.332761	0.00332761	0.00681001	2.26611e-05	14	13.6672	0.136672	0.00093074	0.00307877	0.00093074	0.294524	0.0104534	0.136672	0.668826	0.665747	2.26041	0.000968117	13.9702
8.65213	0.863208	0.00863208		5.87846e-05		13.1368	0.131368	0.000894617	0.00785983	0.000894617		0.0266865	0.131368		0.660966	2.24418	0.00092386	8.55178
14.3101	1.37721	0.0137721		9.37878e-05		12.6228	0.126228	0.000859613	0.0127235	0.000859613		0.0432003	0.126228		0.656102	2.22767	0.00088118	4.65137
19.34	1.8728	0.018728		0.000127538		12.1272	0.121272	0.000825863	0.0168775	0.000825863		0.0573042	0.121272		0.651948	2.21356	0.000841223	2.35939
24.3703	2.40401	0.0240401		0.000163714		11.596	0.11596	0.000789688	0.0208499	0.000789688		0.0707917	0.11596		0.647976	2.20008	0.000799474	0.957727
29.714	2.89071	0.0289071		0.000196858		11.1093	0.111093	0.000756544	0.0248926	0.000756544		0.084518	0.111093		0.643933	2.18635	0.000761141	0.211327
35.0586	3.44863	0.0344863		0.000234852		10.5514	0.105514	0.000718549	0.028733	0.000718549		0.0975572	0.105514		0.640093	2.17331	0.000718604	2.99613e-05
40.4027	3.96962	0.0396962		0.000270331		10.0304	0.100304	0.00068307	0.0323834	0.00068307		0.109951	0.100304		0.636442	2.16092	0.000679226	0.147746
45.747	4.50214	0.0450214		0.000306596		9.49786	0.0949786	0.000646805	0.0358401	0.000646805		0.121688	0.0949786		0.632985	2.14918	0.000639672	0.508787
50.7775	5.04226	0.0504226		0.000343378		8.95774	0.0895774	0.000610023	0.0389088	0.000610023		0.132107	0.0895774		0.629917	2.13876	0.000600371	0.931621
55.8079	5.58534	0.0558534		0.000380362		8.41466	0.0841466	0.000573039	0.0417914	0.000573039		0.141895	0.0841466		0.627034	2.12897	0.000561391	1.3567
61.7807	6.16436	0.0616436		0.000419794		7.83564	0.0783564	0.000533608	0.0449786	0.000533608		0.152716	0.0783564		0.623847	2.11815	0.000520104	1.82342
67.4395	6.73415	0.0673415		0.000458596		7.26585	0.0726585	0.000494805	0.0477786	0.000494805		0.162223	0.0726585		0.621047	2.10864	0.000480119	2.1568
73.4108	7.20212	0.0720212		0.000490465		6.79788	0.0679788	0.000462936	0.0505429	0.000462936		0.171609	0.0679788		0.618283	2.09926	0.000447197	2.47735
78.7551	7.73392	0.0773392		0.000526681		6.26608	0.0626608	0.000426721	0.0528234	0.000426721		0.179352	0.0626608		0.616002	2.09152	0.000410692	2.5692
85.0412	8.26486	0.0826486		0.000562838		5.73514	0.0573514	0.000390564	0.0552785	0.000390564		0.187688	0.0573514		0.613547	2.08318	0.000374395	2.61428
91.9555	8.81522	0.0881523		0.000600318		5.18478	0.0518477	0.000353084	0.0577199	0.000353084		0.195977	0.0518477		0.611106	2.07489	0.00033712	2.54845
98.8684	9.26415	0.0926415		0.000630889		4.73585	0.0473585	0.000322512	0.0599494	0.000322512		0.203546	0.0473585		0.608876	2.06732	0.000306807	2.46649
105.781	9.66775	0.0966775		0.000658375		4.33225	0.0433225	0.000295027	0.0619887	0.000295027		0.210471	0.0433225		0.606837	2.0604	0.00027972	2.34294
112.693	10.0433	0.100433		0.000683949		3.95671	0.0395671	0.000269452	0.0638511	0.000269452		0.216794	0.0395671		0.604974	2.05407	0.000254688	2.17972
119.604	10.3347	0.103347		0.000703791		3.66534	0.0366534	0.00024961	0.0655762	0.00024961		0.222651	0.0366534		0.603249	2.04822	0.000235261	2.05906
126.514	10.5872	0.105872		0.000720988		3.41282	0.0341282	0.000232413	0.0671822	0.000232413		0.228104	0.0341282		0.601643	2.04276	0.000218469	1.94436
133.425	10.8764	0.108764		0.000740684		3.1236	0.031236	0.000212717	0.0686522	0.000212717		0.233095	0.031236		0.600173	2.03777	0.000199467	1.75586
140.334	11.0491	0.110491		0.000752442		2.95094	0.0295094	0.000200959	0.0700407	0.000200959		0.23781	0.0295094		0.598785	2.03306	0.000188005	1.67816
147.243	11.239	0.11239		0.000765376		2.76101	0.0276101	0.000188025	0.0713399	0.000188025		0.242221	0.0276101		0.597486	2.02865	0.000175523	1.56307
154.152	11.3845	0.113845		0.000775283		2.61554	0.0261554	0.000178119	0.0725705	0.000178119		0.246399	0.0261554		0.596255	2.02447	0.000165932	1.48499
161.061	11.5131	0.115131		0.000784042		2.48691	0.0248691	0.000169359	0.0737405	0.000169359		0.250372	0.0248691		0.595085	2.0205	0.000157462	1.41522
167.97	11.6642	0.116642		0.000794331		2.33583	0.0233583	0.00015907	0.0748395	0.00015907		0.254103	0.0233583		0.593986	2.01676	0.000147623	1.31028
174.879	11.8088	0.118088		0.000804179		2.19122	0.0219122	0.000149222	0.0758705	0.000149222		0.257603	0.0219122		0.592955	2.01326	0.000138244	1.20526		k1	0.00156686							Initial CaO conc		wt%	5.32
181.787	11.9253	0.119253		0.000812116		2.07467	0.0207467	0.000141285	0.0768466	0.000141285		0.260918	0.0207467		0.591979	2.00995	0.000130675	1.12572		k2	0.00156686									Mixture mass	705	g
188.695	11.9987	0.119987		0.000817113		2.00129	0.0200129	0.000136288	0.077788	0.000136288		0.264114	0.0200129		0.591038	2.00675	0.000125853	1.08893		Initial CaO	2.27087	mol/l								Mass CaO	37.506	g
195.603	12.0591	0.120591		0.000821228		1.94086	0.0194086	0.000132173	0.078701	0.000132173		0.267214	0.0194086		0.590125	2.00365	0.000121864	1.06268												CaO Molar mass	56.0774	g/mol
202.511	12.1433	0.121433		0.00082696		1.85669	0.0185669	0.000126441	0.0795745	0.000126441		0.27018	0.0185669		0.589251	2.00069	0.000116407	1.00684			0.00313371									Moles CaO	0.668826	moles
209.419	12.2145	0.122145		0.000831811		1.78546	0.0178546	0.00012159	0.0804144	0.00012159		0.273032	0.0178546		0.588411	1.99784	0.000111781	0.962112												Salt height	15	cm
216.327	12.2685	0.122685		0.000835486		1.7315	0.017315	0.000117915	0.081229	0.000117915		0.275797	0.017315		0.587597	1.99507	0.000108253	0.933611												Inner D	5	cm
223.234	12.3224	0.123225		0.00083916		1.67755	0.0167755	0.000114241	0.0820181	0.000114241		0.278476	0.0167755		0.586808	1.99239	0.000104739	0.902908												Vol of salt	294.524	cm3
230.142	12.3462	0.123462		0.000840777		1.65381	0.0165381	0.000112625	0.082796	0.000112625		0.281118	0.0165381		0.58603	1.98975	0.00010312	0.903367												CaO conc	2.27087	conc
237.049	12.3807	0.123807		0.000843129		1.61927	0.0161927	0.000110272	0.0835577	0.000110272		0.283704	0.0161927		0.585268	1.98716	0.000100835	0.890625
243.957	12.452	0.12452		0.000847979		1.54805	0.0154805	0.000105422	0.084286	0.000105422		0.286177	0.0154805		0.58454	1.98469	9.62802e-05	0.835792
250.864	12.4843	0.124843		0.000850183		1.51568	0.0151568	0.000103218	0.0849989	0.000103218		0.288597	0.0151568		0.583827	1.98227	9.4152e-05	0.82192
257.772	12.5383	0.125383		0.000853858		1.46172	0.0146172	9.95433e-05	0.0856865	9.95433e-05		0.290932	0.0146172		0.583139	1.97994	9.06931e-05	0.783253
264.68	12.616	0.12616		0.000859149		1.38402	0.0138402	9.42519e-05	0.0863376	9.42519e-05		0.293143	0.0138402		0.582488	1.97772	8.57763e-05	0.718357
271.587	12.6138	0.126138		0.000859002		1.38618	0.0138618	9.4399e-05	0.0869896	9.4399e-05		0.295356	0.0138618		0.581836	1.97551	8.5814e-05	0.737019
276.295	12.5059	0.125059		0.000851654		1.49409	0.0149409	0.000101748	0.0874686	0.000101748		0.296983	0.0149409		0.581357	1.97388	9.24182e-05
279.111	11.8055	0.118055		0.000803958		2.19446	0.0219446	0.000149443	0.0878895	0.000149443		0.298412	0.0219446		0.580936	1.97246	0.000135642
280.878	10.8915	0.108915		0.000741712		3.1085	0.031085	0.000211689	0.0882635	0.000211689		0.299682	0.031085		0.580562	1.97119	0.000192016
280.979	10.6303	0.106303		0.000723928		3.36965	0.0336965	0.000229473	0.0882867	0.000229473		0.29976	0.0336965		0.580539	1.97111	0.000208139
284.137	12.0311	0.120311		0.000819318		1.96892	0.0196892	0.000134084	0.0887102	0.000134084		0.301198	0.0196892		0.580115	1.96967	0.000121529
285.092	13.0401	0.130401		0.000888031		0.95991	0.0095991	6.537e-05	0.0887727	6.537e-05		0.30141	0.0095991		0.580053	1.96946	5.92429e-05
286.054	14.5477	0.145477		0.000990696		-0.54765	-0.0054765	-3.7295e-05	0.0887368	-3.7295e-05		0.301288	-0.0054765		0.580089	1.96958	-3.38015e-05
286.484	15.4015	0.154015		0.00104884		-1.40146	-0.0140146	-9.54395e-05	0.0886957	-9.54395e-05		0.301149	-0.0140146		0.58013	1.96972	-8.65055e-05
287.656	16.9752	0.169752		0.00115601		-2.97519	-0.0297519	-0.000202611	0.0884582	-0.000202611		0.300343	-0.0297519		0.580367	1.97052	-0.00018372
288.297	17.9545	0.179545		0.0012227		-3.95452	-0.0395452	-0.000269303	0.0882856	-0.000269303		0.299757	-0.0395452		0.58054	1.97111	-0.000244266
288.621	18.7024	0.187024		0.00127363		-4.70237	-0.0470237	-0.000320232	0.0881819	-0.000320232		0.299404	-0.0470237		0.580644	1.97146	-0.000290512
288.941	19.1534	0.191534		0.00130435		-5.15345	-0.0515345	-0.00035095	0.0880696	-0.00035095		0.299023	-0.0515345		0.580756	1.97184	-0.000318442
289.053	19.6679	0.196679		0.00133938		-5.66785	-0.0566785	-0.000385981	0.0880265	-0.000385981		0.298877	-0.0566785		0.580799	1.97199	-0.000350253
289.275	20.6254	0.206254		0.00140459		-6.62541	-0.0662541	-0.000451191	0.0879264	-0.000451191		0.298537	-0.0662541		0.580899	1.97233	-0.000409498
289.915	21.5157	0.215157		0.00146522		-7.5157	-0.075157	-0.00051182	0.0875989	-0.00051182		0.297425	-0.075157		0.581227	1.97344	-0.000464786
290.238	22.2042	0.222042		0.00151211		-8.2042	-0.082042	-0.000558707	0.0874183	-0.000558707		0.296812	-0.082042		0.581407	1.97406	-0.000507522
290.558	22.6909	0.226909		0.00154525		-8.6909	-0.086909	-0.000591851	0.0872287	-0.000591851		0.296168	-0.086909		0.581597	1.9747	-0.000537805
291.519	24.0679	0.240679		0.00163903		-10.0679	-0.100679	-0.000685624	0.0865704	-0.000685624		0.293933	-0.100679		0.582255	1.97693	-0.00062372
292.473	25.0175	0.250175		0.0017037		-11.0175	-0.110175	-0.000750295	0.0858541	-0.000750295		0.291501	-0.110175		0.582971	1.97937	-0.000683392
292.9	25.6269	0.256269		0.00174519		-11.6269	-0.116269	-0.000791792	0.0855163	-0.000791792		0.290354	-0.116269		0.583309	1.98051	-0.000721606
296.35	26.5166	0.265166		0.00180578		-12.5166	-0.125166	-0.000852383	0.0825752	-0.000852383		0.280368	-0.125166		0.58625	1.9905	-0.000780743
296.586	27.3877	0.273877		0.0018651		-13.3877	-0.133877	-0.000911704	0.0823602	-0.000911704		0.279638	-0.133877		0.586465	1.99123	-0.000835384
300.333	25.8722	0.258722		0.0017619		-11.8722	-0.118722	-0.000808499	0.0793305	-0.000808499		0.269351	-0.118722		0.589495	2.00152	-0.000744646
301.581	25.2668	0.252668		0.00172067		-11.2668	-0.112668	-0.000767271	0.0783732	-0.000767271		0.266101	-0.112668		0.590452	2.00477	-0.000707822
302.827	24.5427	0.245427		0.00167136		-10.5427	-0.105427	-0.000717959	0.0774786	-0.000717959		0.263063	-0.105427		0.591347	2.0078	-0.000663335
304.075	23.9136	0.239136		0.00162852		-9.91357	-0.0991357	-0.000675115	0.0766364	-0.000675115		0.260204	-0.0991357		0.592189	2.01066	-0.000624638
305.321	23.2251	0.232251		0.00158163		-9.22507	-0.0922507	-0.000628228	0.0758532	-0.000628228		0.257545	-0.0922507		0.592972	2.01332	-0.000582026
305.63	22.8096	0.228096		0.00155334		-8.8096	-0.088096	-0.000599935	0.0756682	-0.000599935		0.256917	-0.088096		0.593157	2.01395	-0.000555986
306.562	22.133	0.22133		0.00150726		-8.13298	-0.0813298	-0.000553857	0.0751516	-0.000553857		0.255163	-0.0813298		0.593674	2.0157	-0.000513731
307.805	21.1501	0.211501		0.00144032		-7.15009	-0.0715009	-0.000486922	0.0745465	-0.000486922		0.253108	-0.0715009		0.594279	2.01776	-0.000452106
308.942	20.1031	0.201031		0.00136902		-6.1031	-0.061031	-0.000415622	0.0740738	-0.000415622		0.251503	-0.061031		0.594752	2.01936	-0.000386211
310.291	19.2484	0.192484		0.00131082		-5.24842	-0.0524842	-0.000357418	0.0735917	-0.000357418		0.249866	-0.0524842		0.595234	2.021	-0.000332395
311.536	18.3832	0.183832		0.0012519		-4.38318	-0.0438318	-0.000298495	0.0732202	-0.000298495		0.248605	-0.0438318		0.595605	2.02226	-0.00027777
313.098	17.8002	0.178002		0.0012122		-3.8002	-0.038002	-0.000258794	0.072816	-0.000258794		0.247233	-0.038002		0.59601	2.02363	-0.000240989
315.28	16.6606	0.166606		0.00113459		-2.66062	-0.0266062	-0.000181188	0.0724206	-0.000181188		0.24589	-0.0266062		0.596405	2.02498	-0.000168835
316.526	15.9484	0.159484		0.00108609		-1.94839	-0.0194839	-0.000132686	0.0722552	-0.000132686		0.245329	-0.0194839		0.59657	2.02554	-0.000123673
317.771	15.1056	0.151056		0.00102869		-1.10557	-0.0110557	-7.52894e-05	0.0721615	-7.52894e-05		0.24501	-0.0110557		0.596664	2.02586	-7.01866e-05
319.015	14.2509	0.142509		0.000970487		-0.25089	-0.0025089	-1.70856e-05	0.0721403	-1.70856e-05		0.244938	-0.0025089		0.596685	2.02593	-1.59282e-05
320.263	13.6574	0.136574		0.000930067		0.34264	0.0034264	2.33338e-05	0.0721694	2.33338e-05		0.245037	0.0034264		0.596656	2.02583	2.1752e-05
321.51	13.0163	0.130163		0.000886414		0.98366	0.0098366	6.69873e-05	0.0722529	6.69873e-05		0.245321	0.0098366		0.596573	2.02555	6.24376e-05
322.757	12.3635	0.123635		0.000841953		1.63654	0.0163654	0.000111449	0.0723919	0.000111449		0.245793	0.0163654		0.596434	2.02507	0.000103855
324.006	11.8174	0.118174		0.000804767		2.18259	0.0218259	0.000148635	0.0725775	0.000148635		0.246423	0.0218259		0.596248	2.02444	0.000138464
325.567	11.1764	0.111764		0.000761114		2.8236	0.028236	0.000192287	0.0728777	0.000192287		0.247442	0.028236		0.595948	2.02343	0.00017904
327.442	10.5354	0.105354		0.000717461		3.46461	0.0346461	0.00023594	0.0733201	0.00023594		0.248944	0.0346461		0.595505	2.02192	0.000219522
329.317	9.83898	0.0983898		0.000670035		4.16102	0.0416102	0.000283366	0.0738512	0.000283366		0.250748	0.0416102		0.594974	2.02012	0.000263413
331.193	9.29293	0.0929293		0.000632849		4.70707	0.0470707	0.000320552	0.0744528	0.000320552		0.25279	0.0470707		0.594373	2.01808	0.000297679
333.382	8.65389	0.0865389		0.000589331		5.34611	0.0534611	0.00036407	0.0752497	0.00036407		0.255496	0.0534611		0.593576	2.01537	0.000337638
335.885	7.95353	0.0795353		0.000541636		6.04647	0.0604647	0.000411765	0.0762801	0.000411765		0.258994	0.0604647		0.592545	2.01187	0.000381208
338.389	7.40154	0.0740154		0.000504046		6.59846	0.0659846	0.000449355	0.0774054	0.000449355		0.262815	0.0659846		0.59142	2.00805	0.000415218
340.893	6.84362	0.0684362		0.000466051		7.15638	0.0715638	0.00048735	0.0786258	0.00048735		0.266959	0.0715638		0.5902	2.00391	0.000449397
343.711	6.27621	0.0627621		0.00042741		7.72379	0.0772379	0.000525991	0.080108	0.000525991		0.271991	0.0772379		0.588718	1.99888	0.000483811
347.157	5.73966	0.0573966		0.000390871		8.26034	0.0826034	0.00056253	0.0820467	0.00056253		0.278574	0.0826034		0.586779	1.99229	0.000515716
350.604	5.22685	0.0522685		0.000355949		8.77315	0.0877315	0.000597453	0.0841059	0.000597453		0.285565	0.0877315		0.58472	1.9853	0.00054581
354.365	4.70522	0.0470522		0.000320426		9.29478	0.0929478	0.000632975	0.0864862	0.000632975		0.293647	0.0929478		0.582339	1.97722	0.000575908
358.753	4.20665	0.0420665		0.000286473		9.79335	0.0979335	0.000666928	0.0894131	0.000666928		0.303585	0.0979335		0.579412	1.96728	0.00060375
364.397	3.68712	0.0368712		0.000251093		10.3129	0.103129	0.000702308	0.0933771	0.000702308		0.317044	0.103129		0.575449	1.95382	0.000631429
370.983	3.14711	0.0314711		0.000214319		10.8529	0.108529	0.000739082	0.0982445	0.000739082		0.33357	0.108529		0.570581	1.9373	0.000658871
377.57	2.68999	0.0268999		0.000183188		11.31	0.1131	0.000770213	0.103318	0.000770213		0.350795	0.1131		0.565508	1.92007	0.000680518
384.221	2.31617	0.0231617		0.000157732		11.6838	0.116838	0.00079567	0.10861	0.00079567		0.368763	0.116838		0.560216	1.9021	0.000696432
391.374	1.94322	0.0194322		0.000132333		12.0568	0.120568	0.000821068	0.114483	0.000821068		0.388704	0.120568		0.554343	1.88216	0.000711128
398.277	1.66048	0.0166048		0.000113079		12.3395	0.123395	0.000840322	0.120284	0.000840322		0.4084	0.123395		0.548542	1.86247	0.000720188
405.181	1.44465	0.0144465		9.8381e-05		12.5553	0.125553	0.00085502	0.126187	0.00085502		0.428443	0.125553		0.542639	1.84242	0.000724899
412.086	1.26336	0.0126336		8.60347e-05		12.7366	0.127366	0.000867367	0.132176	0.000867367		0.448776	0.127366		0.53665	1.82209	0.000727251
418.99	1.09717	0.0109717		7.47172e-05		12.9028	0.129028	0.000878684	0.138243	0.000878684		0.469376	0.129028		0.530583	1.80149	0.000728411
425.896	0.978461	0.00978461		6.66333e-05		13.0215	0.130215	0.000886768	0.144366	0.000886768		0.490167	0.130215		0.524459	1.7807	0.000726628
432.802	0.94177	0.0094177		6.41346e-05		13.0582	0.130582	0.000889267	0.150508	0.000889267		0.51102	0.130582		0.518318	1.75985	0.000720142
439.707	0.816589	0.00816589		5.56098e-05		13.1834	0.131834	0.000897791	0.156707	0.000897791		0.532069	0.131834		0.512118	1.7388	0.00071835
446.075	0.740432	0.00740432		5.04235e-05		13.2596	0.132596	0.000902978	0.162457	0.000902978		0.551592	0.132596		0.506368	1.71928	0.000714387
453.519	0.667667	0.00667667		4.54682e-05		13.3323	0.133323	0.000907933	0.169216	0.000907933		0.57454	0.133323		0.49961	1.69633	0.00070872
460.425	0.57558	0.0057558		3.9197e-05		13.4244	0.134244	0.000914204	0.175529	0.000914204		0.595975	0.134244		0.493296	1.67489	0.000704598
467.959	0.466946	0.00466946		3.1799e-05		13.5331	0.135331	0.000921602	0.182472	0.000921602		0.619548	0.135331		0.486354	1.65132	0.000700303
474.865	0.402197	0.00402197		2.73896e-05		13.5978	0.135978	0.000926012	0.188867	0.000926012		0.641262	0.135978		0.479958	1.62961	0.000694401

## Sheet: 20cm height  
20cm		Ideal gas law	mol/min	mol/min				mol/min	Moles CO2	mol/min	0.392699	mol/L	Partial pressure		mol		Oxide concentration
Time (mins)	CO2(vol%)	Molar fraction	Total molar flow out	CO2 moles exiting	CO2 entering vol%	Co2 absorbed (vol%)	Molar fraction	Moles being absorbed	Moles in solution	Rate of absorption	Molten salt vol (L)	CO2 concentration	CO2 partial pressure	CaO moles	CaO molar change	O2-	Predicted rate	Error
4.71193	0.370787	0.00370787	0.00681001	2.52506e-05	14	13.6292	0.136292	0.000928151	0.00437338	0.000928151	0.392699	0.0111367	0.136292	0.891767	0.887394	2.25973	0.000960705	10.5981
10.1511	0.78436	0.0078436		5.3415e-05		13.2156	0.132156	0.000899986	0.00926853	0.000899986		0.0236021	0.132156		0.882499	2.24727	0.000926414	6.98443
15.948	0.94853	0.0094853		6.4595e-05		13.0515	0.130515	0.000888806	0.0144209	0.000888806		0.0367226	0.130515		0.877347	2.23414	0.000909564	4.30902
23.4143	1.34753	0.0134753		9.17668e-05		12.6525	0.126525	0.000861634	0.0208541	0.000861634		0.0531046	0.126525		0.870913	2.21776	0.000875292	1.86541
30.3274	1.80509	0.0180509		0.000122927		12.1949	0.121949	0.000830475	0.0265952	0.000830475		0.0677242	0.121949		0.865172	2.20314	0.000838077	0.578022
37.2411	2.31013	0.0231013		0.00015732		11.6899	0.116899	0.000796081	0.0320991	0.000796081		0.0817397	0.116899		0.859668	2.18913	0.000798259	0.0474028
43.8416	2.87409	0.0287409		0.000195726		11.1259	0.111259	0.000757675	0.0371001	0.000757675		0.0944747	0.111259		0.854667	2.17639	0.000755328	0.0551115
49.8137	3.40246	0.0340246		0.000231708		10.5975	0.105975	0.000721693	0.0414102	0.000721693		0.10545	0.105975		0.850357	2.16542	0.000715829	0.343899
55.4716	3.90631	0.0390631		0.00026602		10.0937	0.100937	0.000687381	0.0452993	0.000687381		0.115354	0.100937		0.846468	2.15551	0.000678678	0.757539
61.1296	4.42598	0.0442598		0.000301409		9.57402	0.0957402	0.000651992	0.0489883	0.000651992		0.124748	0.0957402		0.842779	2.14612	0.000640931	1.22347
66.474	4.9651	0.049651		0.000338124		9.0349	0.090349	0.000615278	0.0522766	0.000615278		0.133121	0.090349		0.839491	2.13775	0.000602479	1.63791
71.8183	5.49961	0.0549961		0.000374524		8.50039	0.0850039	0.000578877	0.0553703	0.000578877		0.140999	0.0850039		0.836397	2.12987	0.000564748	1.99653
77.0052	6.00139	0.0600139		0.000408695		7.99861	0.0799861	0.000544706	0.0581956	0.000544706		0.148194	0.0799861		0.833572	2.12267	0.000529615	2.27735
80.6789	6.46132	0.0646132		0.000440016		7.53868	0.0753868	0.000513385	0.0600816	0.000513385		0.152997	0.0753868		0.831686	2.11787	0.000498032	2.357
85.9656	6.95343	0.0695343		0.000473529		7.04657	0.0704657	0.000479872	0.0626186	0.000479872		0.159457	0.0704657		0.829149	2.11141	0.000464102	2.48704
90.9955	7.45793	0.0745793		0.000507886		6.54207	0.0654207	0.000445516	0.0648595	0.000445516		0.165163	0.0654207		0.826908	2.1057	0.00042971	2.49822
95.7113	7.9442	0.079442		0.000541001		6.0558	0.060558	0.000412401	0.0668043	0.000412401		0.170116	0.060558		0.824963	2.10075	0.000396834	2.42314
100.427	8.44319	0.0844319		0.000574982		5.55681	0.0555681	0.000378419	0.0685889	0.000378419		0.17466	0.0555681		0.823179	2.09621	0.000363348	2.2715
105.457	8.94769	0.0894769		0.000609339		5.05231	0.0505231	0.000344063	0.0703195	0.000344063		0.179067	0.0505231		0.821448	2.0918	0.000329665	2.07294
112.561	9.56674	0.0956674		0.000651496		4.43326	0.0443326	0.000301905	0.0724641	0.000301905		0.184528	0.0443326		0.819303	2.08634	0.000288516	1.7926
116.041	10.0212	0.100212		0.000682442		3.97884	0.0397884	0.000270959	0.0734072	0.000270959		0.18693	0.0397884		0.81836	2.08394	0.000258645	1.51646
129.851	11.0192	0.110192		0.000750406		2.98083	0.0298083	0.000202995	0.0762104	0.000202995		0.194068	0.0298083		0.815557	2.0768	0.000193105	0.978
135.944	11.4375	0.114376		0.000778898		2.56245	0.0256245	0.000174503	0.0772737	0.000174503		0.196776	0.0256245		0.814494	2.07409	0.000165785	0.759994
142.856	11.839	0.11839		0.000806236		2.16101	0.0216101	0.000147165	0.0782909	0.000147165		0.199366	0.0216101		0.813477	2.0715	0.000139638	0.566502
153.086	12.2906	0.122906		0.000836992		1.70938	0.0170938	0.000116409	0.0794818	0.000116409		0.202399	0.0170938		0.812286	2.06847	0.000110294	0.373974
157.093	12.5328	0.125328		0.000853485		1.4672	0.014672	9.99164e-05	0.0798821	9.99164e-05		0.203418	0.014672		0.811885	2.06745	9.46209e-05	0.280433
163.589	12.7217	0.127217		0.000866352		1.27826	0.0127826	8.70496e-05	0.0804476	8.70496e-05		0.204858	0.0127826		0.81132	2.06601	8.23786e-05	0.218188
170.498	12.9203	0.129203		0.000879874		1.0797	0.010797	7.35277e-05	0.0809556	7.35277e-05		0.206152	0.010797		0.810812	2.06472	6.95386e-05	0.159125
177.407	13.0843	0.130843		0.000891044		0.91567	0.0091567	6.23572e-05	0.0813865	6.23572e-05		0.207249	0.0091567		0.810381	2.06362	5.89428e-05	0.116579		k1	0.00155967							Initial CaO conc		wt%	5.32
185.124	13.1988	0.131988		0.000898839		0.80121	0.0080121	5.45625e-05	0.0818075	5.45625e-05		0.208321	0.0080121		0.80996	2.06255	5.15481e-05	0.0908636		k2	0.00155967									Mixture mass	940	g
191.225	13.3843	0.133843		0.000911474		0.61567	0.0061567	4.19272e-05	0.0820633	4.19272e-05		0.208973	0.0061567		0.809704	2.06189	3.95984e-05	0.054234		Initial CaO	2.27087	mol/l								Mass CaO	50.008	g
198.133	13.4642	0.134642		0.000916913		0.53581	0.0053581	3.64887e-05	0.0823154	3.64887e-05		0.209614	0.0053581		0.809452	2.06125	3.44512e-05	0.0415129												CaO Molar mass	56.0774	g/mol
205.042	13.5548	0.135548		0.000923086		0.44516	0.0044516	3.03154e-05	0.0825248	3.03154e-05		0.210148	0.0044516		0.809243	2.06072	2.86153e-05	0.0289058			0.00311934									Moles CaO	0.891767	moles
211.949	13.6088	0.136088		0.00092676		0.3912	0.003912	2.66408e-05	0.0827088	2.66408e-05		0.210616	0.003912		0.809059	2.06025	2.5141e-05	0.0224941												Salt height	20	cm
218.541	13.5291	0.135292		0.000921336		0.47085	0.0047085	3.20649e-05	0.0829202	3.20649e-05		0.211155	0.0047085		0.808847	2.05971	3.02519e-05													Inner D	5	cm
220.103	12.9143	0.129143		0.000879462		1.08574	0.0108574	7.3939e-05	0.0830357	7.3939e-05		0.211449	0.0108574		0.808732	2.05942	6.97482e-05													Vol of salt	392.699	cm3
221.13	11.5035	0.115035		0.000783391		2.49647	0.0249647	0.00017001	0.0832104	0.00017001		0.211894	0.0249647		0.808557	2.05897	0.000160339													CaO conc	2.27087	conc
221.14	12.2315	0.122315		0.000832968		1.76848	0.0176848	0.000120434	0.0832116	0.000120434		0.211897	0.0176848		0.808556	2.05897	0.000113583
225.521	11.1289	0.111289		0.00075788		2.87108	0.0287108	0.000195521	0.0840681	0.000195521		0.214078	0.0287108		0.807699	2.05679	0.000184204
226.742	12.0484	0.120484		0.0008205		1.95156	0.0195156	0.000132901	0.0842304	0.000132901		0.214491	0.0195156		0.807537	2.05638	0.000125184
226.994	11.7225	0.117225		0.0007983		2.27755	0.0227755	0.000155101	0.0842694	0.000155101		0.21459	0.0227755		0.807498	2.05628	0.000146087
227.281	12.3776	0.123776		0.000842919		1.62235	0.0162235	0.000110482	0.0843012	0.000110482		0.214671	0.0162235		0.807466	2.0562	0.000104057
227.64	13.0994	0.130994		0.000892073		0.90056	0.0090056	6.13282e-05	0.0843232	6.13282e-05		0.214727	0.0090056		0.807444	2.05614	5.77601e-05
228.436	13.9304	0.139304		0.00094866		0.06962	0.0006962	4.74113e-06	0.084327	4.74113e-06		0.214737	0.0006962		0.80744	2.05613	4.46527e-06
228.706	14.5872	0.145872		0.000993391		-0.58722	-0.0058722	-3.99897e-05	0.0843162	-3.99897e-05		0.214709	-0.0058722		0.807451	2.05616	-3.76634e-05
229.063	15.1465	0.151465		0.00103148		-1.14646	-0.0114646	-7.8074e-05	0.0842883	-7.8074e-05		0.214638	-0.0114646		0.807479	2.05623	-7.35348e-05
229.642	16.0997	0.160997		0.00109639		-2.09974	-0.0209974	-0.000142992	0.0842055	-0.000142992		0.214427	-0.0209974		0.807562	2.05644	-0.000134693
230.043	16.7675	0.167675		0.00114187		-2.76746	-0.0276746	-0.000188464	0.0841298	-0.000188464		0.214235	-0.0276746		0.807638	2.05663	-0.000177542
230.444	17.3432	0.173432		0.00118107		-3.34318	-0.0334318	-0.000227671	0.0840387	-0.000227671		0.214003	-0.0334318		0.807729	2.05686	-0.0002145
230.843	17.8952	0.178952		0.00121866		-3.89517	-0.0389517	-0.000265261	0.0839327	-0.000265261		0.213733	-0.0389517		0.807835	2.05713	-0.000249949
230.99	18.3964	0.183964		0.00125279		-4.39637	-0.0439637	-0.000299393	0.0838889	-0.000299393		0.213621	-0.0439637		0.807879	2.05725	-0.000282126
231.489	19.1914	0.191914		0.00130694		-5.19144	-0.0519144	-0.000353538	0.0837125	-0.000353538		0.213172	-0.0519144		0.808055	2.0577	-0.00033322
231.777	19.8762	0.198762		0.00135357		-5.87624	-0.0587624	-0.000400172	0.0835972	-0.000400172		0.212878	-0.0587624		0.80817	2.05799	-0.000377229
232.282	21.1609	0.211609		0.00144106		-7.1609	-0.071609	-0.000487658	0.0833506	-0.000487658		0.212251	-0.071609		0.808417	2.05862	-0.000459839
232.291	20.483	0.20483		0.00139489		-6.48296	-0.0648296	-0.00044149	0.083347	-0.00044149		0.212241	-0.0648296		0.80842	2.05863	-0.000416307
232.779	21.8006	0.218006		0.00148462		-7.8006	-0.078006	-0.000531222	0.0830874	-0.000531222		0.21158	-0.078006		0.80868	2.05929	-0.000501081
232.925	22.2899	0.222899		0.00151795		-8.28993	-0.0828993	-0.000564545	0.083005	-0.000564545		0.21137	-0.0828993		0.808762	2.0595	-0.000532568
233.422	22.8808	0.228808		0.00155819		-8.88083	-0.0888083	-0.000604785	0.0827048	-0.000604785		0.210606	-0.0888083		0.809063	2.06026	-0.00057074
233.568	23.3992	0.233992		0.00159349		-9.39918	-0.0939918	-0.000640085	0.0826111	-0.000640085		0.210367	-0.0939918		0.809156	2.0605	-0.000604123
234.07	24.3884	0.243884		0.00166085		-10.3884	-0.103884	-0.00070745	0.0822563	-0.00070745		0.209464	-0.103884		0.809511	2.0614	-0.000667996
234.925	25.7298	0.257298		0.0017522		-11.7298	-0.117298	-0.000798798	0.0815732	-0.000798798		0.207724	-0.117298		0.810194	2.06314	-0.000754886
234.976	25.0955	0.250955		0.00170901		-11.0955	-0.110955	-0.000755607	0.0815344	-0.000755607		0.207626	-0.110955		0.810233	2.06324	-0.000714104
235.7	26.289	0.26289		0.00179028		-12.289	-0.12289	-0.000836883	0.0809289	-0.000836883		0.206084	-0.12289		0.810839	2.06478	-0.000791506
236.826	27.0553	0.270553		0.00184247		-13.0553	-0.130553	-0.000889068	0.0799273	-0.000889068		0.203533	-0.130553		0.81184	2.06733	-0.000841901
238.351	27.5994	0.275994		0.00187952		-13.5994	-0.135994	-0.00092612	0.0785153	-0.00092612		0.199938	-0.135994		0.813252	2.07093	-0.000878512
240.05	28.125	0.28125		0.00191531		-14.125	-0.14125	-0.000961914	0.0768811	-0.000961914		0.195776	-0.14125		0.814886	2.07509	-0.000914299
242.658	26.8545	0.268545		0.00182879		-12.8545	-0.128545	-0.000875393	0.0745981	-0.000875393		0.189962	-0.128545		0.817169	2.0809	-0.000834393
242.902	27.5341	0.275341		0.00187508		-13.5341	-0.135341	-0.000921674	0.0743727	-0.000921674		0.189389	-0.135341		0.817395	2.08148	-0.000878748
243.512	26.1492	0.261492		0.00178076		-12.1492	-0.121492	-0.000827362	0.0738684	-0.000827362		0.188104	-0.121492		0.817899	2.08276	-0.000789315
244.341	25.5359	0.255359		0.001739		-11.5359	-0.115359	-0.000785595	0.0732172	-0.000785595		0.186446	-0.115359		0.81855	2.08442	-0.000750066
245.029	24.8355	0.248355		0.0016913		-10.8355	-0.108355	-0.0007379	0.0727093	-0.0007379		0.185153	-0.108355		0.819058	2.08571	-0.000704965
245.89	24.0204	0.240204		0.00163579		-10.0204	-0.100204	-0.00068239	0.0721216	-0.00068239		0.183656	-0.100204		0.819646	2.08721	-0.0006524
246.93	23.5337	0.235337		0.00160265		-9.53371	-0.0953371	-0.000649246	0.0714464	-0.000649246		0.181937	-0.0953371		0.820321	2.08893	-0.000621225
247.027	22.9718	0.229718		0.00156438		-8.97183	-0.0897183	-0.000610982	0.071387	-0.000610982		0.181786	-0.0897183		0.82038	2.08908	-0.000584654
247.647	22.3664	0.223664		0.00152316		-8.36643	-0.0836643	-0.000569755	0.0710339	-0.000569755		0.180886	-0.0836643		0.820734	2.08998	-0.000545438
248.297	21.7548	0.217548		0.0014815		-7.75481	-0.0775481	-0.000528103	0.0706908	-0.000528103		0.180013	-0.0775481		0.821077	2.09085	-0.000505775
248.887	21.1319	0.211319		0.00143908		-7.13189	-0.0713189	-0.000485682	0.0704044	-0.000485682		0.179283	-0.0713189		0.821363	2.09158	-0.00046531
249.716	20.5423	0.205423		0.00139893		-6.54231	-0.0654231	-0.000445532	0.0700349	-0.000445532		0.178342	-0.0654231		0.821733	2.09252	-0.000427036
250.337	20.0081	0.200081		0.00136256		-6.00814	-0.0600814	-0.000409155	0.0697809	-0.000409155		0.177696	-0.0600814		0.821987	2.09317	-0.00039229
251.083	19.4621	0.194621		0.00132537		-5.46209	-0.0546209	-0.000371969	0.0695034	-0.000371969		0.176989	-0.0546209		0.822264	2.09388	-0.000356757
251.704	18.935	0.18935		0.00128948		-4.93503	-0.0493503	-0.000336076	0.0692947	-0.000336076		0.176457	-0.0493503		0.822473	2.09441	-0.000322414
252.325	18.4127	0.184127		0.00125391		-4.41273	-0.0441273	-0.000300507	0.0691081	-0.000300507		0.175982	-0.0441273		0.822659	2.09488	-0.000288357
253.238	17.8437	0.178437		0.00121516		-3.84373	-0.0384373	-0.000261758	0.068869	-0.000261758		0.175373	-0.0384373		0.822898	2.09549	-0.000251248
253.798	17.1999	0.171999		0.00117131		-3.19989	-0.0319989	-0.000217913	0.0687471	-0.000217913		0.175063	-0.0319989		0.82302	2.0958	-0.000209194
254.865	16.525	0.16525		0.00112535		-2.52496	-0.0252496	-0.00017195	0.0685635	-0.00017195		0.174596	-0.0252496		0.823204	2.09627	-0.000165107
255.696	15.7763	0.157763		0.00107436		-1.77626	-0.0177626	-0.000120963	0.068463	-0.000120963		0.17434	-0.0177626		0.823304	2.09653	-0.000116164
257.267	15.0191	0.150191		0.0010228		-1.01909	-0.0101909	-6.94001e-05	0.068354	-6.94001e-05		0.174062	-0.0101909		0.823413	2.09681	-6.66551e-05
258.11	14.3459	0.143459		0.000976954		-0.34585	-0.0034585	-2.35524e-05	0.0683341	-2.35524e-05		0.174011	-0.0034585		0.823433	2.09686	-2.26214e-05
259.2	13.7078	0.137078		0.000933503		0.29219	0.0029219	1.98982e-05	0.0683558	1.98982e-05		0.174067	0.0029219		0.823412	2.0968	1.91111e-05
261.596	12.835	0.12835		0.000874067		1.16497	0.0116497	7.93346e-05	0.0685459	7.93346e-05		0.174551	0.0116497		0.823222	2.09632	7.61788e-05
262.415	12.2863	0.122863		0.000836698		1.7137	0.017137	0.000116703	0.0686415	0.000116703		0.174794	0.017137		0.823126	2.09607	0.000112048
263.515	11.5602	0.115602		0.000787252		2.43978	0.0243978	0.000166149	0.0688242	0.000166149		0.175259	0.0243978		0.822943	2.09561	0.000159486
264.971	10.9509	0.109509		0.000745755		3.04914	0.0304914	0.000207647	0.0691267	0.000207647		0.17603	0.0304914		0.822641	2.09484	0.000199246
266.741	10.269	0.10269		0.000699317		3.73104	0.0373104	0.000254084	0.0695765	0.000254084		0.177175	0.0373104		0.822191	2.09369	0.000243672
268.642	9.58574	0.0958574		0.000652789		4.41426	0.0441426	0.000300612	0.0701479	0.000300612		0.17863	0.0441426		0.82162	2.09224	0.000288092
270.979	8.86822	0.0886822		0.000603927		5.13178	0.0513178	0.000349474	0.0709643	0.000349474		0.180709	0.0513178		0.820803	2.09016	0.000334587
273.68	8.18161	0.0818161		0.000557168		5.81839	0.0581839	0.000396233	0.0720349	0.000396233		0.183435	0.0581839		0.819733	2.08743	0.000378859
275.646	7.61861	0.0761861		0.000518828		6.38139	0.0638139	0.000434573	0.0728892	0.000434573		0.185611	0.0638139		0.818878	2.08526	0.000415086
278.349	7.03751	0.0703751		0.000479255		6.96249	0.0696249	0.000474146	0.0741709	0.000474146		0.188875	0.0696249		0.817597	2.08199	0.000452175
280.924	6.49641	0.0649641		0.000442406		7.50359	0.0750359	0.000510995	0.0754863	0.000510995		0.192224	0.0750359		0.816281	2.07864	0.000486532
283.498	6.00081	0.0600081		0.000408656		7.99919	0.0799919	0.000544746	0.0768889	0.000544746		0.195796	0.0799919		0.814879	2.07507	0.000517776
287.503	5.4785	0.054785		0.000373087		8.5215	0.085215	0.000580315	0.0792128	0.000580315		0.201714	0.085215		0.812555	2.06915	0.000550011
291.263	4.94828	0.0494828		0.000336979		9.05172	0.0905172	0.000616423	0.0815308	0.000616423		0.207617	0.0905172		0.810237	2.06325	0.000582567
295.338	4.42371	0.0442371		0.000301255		9.57629	0.0957629	0.000652146	0.0841879	0.000652146		0.214383	0.0957629		0.80758	2.05648	0.000614307
300.04	3.89674	0.0389674		0.000265369		10.1033	0.101033	0.000688033	0.0874232	0.000688033		0.222621	0.101033		0.804344	2.04825	0.000645515
305.37	3.36026	0.0336026		0.000228834		10.6397	0.106397	0.000724567	0.0912851	0.000724567		0.232456	0.106397		0.800482	2.03841	0.000676528
310.7	2.83729	0.0283729		0.00019322		11.1627	0.111627	0.000760181	0.095337	0.000760181		0.242774	0.111627		0.79643	2.02809	0.000706188
315.716	2.28828	0.0228828		0.000155832		11.7117	0.117117	0.000797569	0.0993377	0.000797569		0.252961	0.117117		0.79243	2.01791	0.000737199
321.675	1.83099	0.0183099		0.00012469		12.169	0.12169	0.000828711	0.104276	0.000828711		0.265536	0.12169		0.787492	2.00533	0.000761209
328.577	1.46839	0.0146839		9.99978e-05		12.5316	0.125316	0.000853403	0.110166	0.000853403		0.280536	0.125316		0.781601	1.99033	0.000778027
335.48	1.12522	0.0112522		7.66279e-05		12.8748	0.128748	0.000876773	0.116218	0.000876773		0.295947	0.128748		0.775549	1.97492	0.000793144
342.383	0.857597	0.00857597		5.84024e-05		13.1424	0.131424	0.000894999	0.122397	0.000894999		0.31168	0.131424		0.769371	1.95919	0.000803181
349.287	0.648242	0.00648242		4.41453e-05		13.3518	0.133518	0.000909256	0.128674	0.000909256		0.327666	0.133518		0.763093	1.9432	0.000809318
356.192	0.47342	0.0047342		3.224e-05		13.5266	0.135266	0.000921161	0.135034	0.000921161		0.343862	0.135266		0.756733	1.92701	0.000813081
363.097	0.326656	0.00326656		2.22453e-05		13.6733	0.136733	0.000931156	0.141464	0.000931156		0.360235	0.136733		0.750303	1.91063	0.000814919
369.688	0.212699

## Sheet: 10 wt% 
10wt%		Ideal gas law	mol/min	mol/min				mol/min	Moles CO2	mol/min	0.392699	mol/L	Partial pressure		mol		Oxide concentration
Time (mins)	CO2(vol%)	Molar fraction	Total molar flow out	CO2 moles exiting	CO2 entering vol%	Co2 absorbed (vol%)	Molar fraction	Moles being absorbed	Moles in solution	Rate of absorption	Molten salt vol (L)	CO2 concentration	CO2 partial pressure	CaO moles	CaO molar change	O2-	Predicted rate	Error
0.577617	0	0	0.00684189	0	14	14	0.14	0.000957864	0.000553279	0.000957864	0.19635	0.00281783	0.14	1.1395	1.13894	5.80059	0.000980931	5.32077
1.73603	0.165062	0.00165062		1.12933e-05		13.8349	0.138349	0.000946571	0.0016498	0.000946571		0.00840235	0.138349		1.13785	5.79501	0.000968432	4.77929
4.05127	0.412655	0.00412655		2.82334e-05		13.5873	0.135873	0.000929631	0.00380211	0.000929631		0.019364	0.135873		1.13569	5.78404	0.000949302	3.86959
8.98962	0.729042	0.00729042		4.98802e-05		13.271	0.13271	0.000907984	0.00828605	0.000907984		0.0422005	0.13271		1.13121	5.76121	0.000923536	2.41879
13.3059	1.0729	0.010729		7.34067e-05		12.9271	0.129271	0.000884457	0.0121036	0.000884457		0.0616431	0.129271		1.12739	5.74176	0.000896571	1.46738
17.3607	1.31593	0.0131593		9.00346e-05		12.6841	0.126841	0.00086783	0.0156225	0.00086783		0.0795648	0.126841		1.12387	5.72384	0.000876969	0.83539
21.4036	1.65062	0.0165062		0.000112933		12.3494	0.123494	0.000844931	0.0190385	0.000844931		0.0969622	0.123494		1.12046	5.70645	0.000851234	0.397356
25.4796	1.9597	0.019597		0.000134081		12.0403	0.120403	0.000823784	0.0223962	0.000823784		0.114063	0.120403		1.1171	5.68934	0.000827442	0.133865
28.3462	2.22834	0.0222834		0.00015246		11.7717	0.117717	0.000805404	0.0247049	0.000805404		0.125821	0.117717		1.11479	5.67759	0.000807309	0.0362977
31.8232	2.50264	0.0250264		0.000171228		11.4974	0.114974	0.000786636	0.0274401	0.000786636		0.139752	0.114974		1.11206	5.66366	0.000786563	5.44988e-05
35.2887	2.80605	0.0280605		0.000191987		11.1939	0.111939	0.000765877	0.0300942	0.000765877		0.153269	0.111939		1.1094	5.65014	0.000763978	0.0360845
39.9176	3.21871	0.0321871		0.00022022		10.7813	0.107813	0.000737644	0.0335087	0.000737644		0.170659	0.107813		1.10599	5.63275	0.00073355	0.167627
42.232	3.42503	0.0342503		0.000234337		10.575	0.10575	0.000723527	0.0351833	0.000723527		0.179187	0.10575		1.10431	5.62422	0.000718422	0.260638
44.7662	3.71262	0.0371262		0.000254013		10.2874	0.102874	0.000703851	0.036967	0.000703851		0.188271	0.102874		1.10253	5.61514	0.000697756	0.371526
48.0201	4.04402	0.0404402		0.000276687		9.95598	0.0995598	0.000681177	0.0391835	0.000681177		0.19956	0.0995598		1.10031	5.60385	0.000673921	0.526565
51.4906	4.29161	0.0429161		0.000293627		9.70839	0.0970839	0.000664237	0.0414887	0.000664237		0.2113	0.0970839		1.09801	5.59211	0.000655784	0.714499
53.4457	4.5278	0.045278		0.000309787		9.4722	0.094722	0.000648077	0.0427558	0.000648077		0.217753	0.094722		1.09674	5.58565	0.000639092	0.807397
59.4229	5.11553	0.0511553		0.000349999		8.88447	0.0888447	0.000607865	0.0463891	0.000607865		0.236258	0.0888447		1.09311	5.56715	0.000597452	1.08448
65.1724	5.71683	0.0571683		0.000391139		8.28317	0.0828317	0.000566725	0.0496474	0.000566725		0.252852	0.0828317		1.08985	5.55056	0.000555355	1.29263
70.0109	6.18982	0.0618982		0.000423501		7.81018	0.0781018	0.000534364	0.052233	0.000534364		0.26602	0.0781018		1.08726	5.53739	0.000522401	1.431
73.1289	6.48305	0.0648305		0.000443563		7.51695	0.0751695	0.000514301	0.0538366	0.000514301		0.274188	0.0751695		1.08566	5.52922	0.000502046	1.50182
79.5369	7.07689	0.0707689		0.000484193		6.92311	0.0692311	0.000473671	0.0568719	0.000473671		0.289646	0.0692311		1.08262	5.51376	0.000461092	1.58243
83.8991	7.51032	0.0751032		0.000513847		6.48968	0.0648968	0.000444017	0.0588088	0.000444017		0.299511	0.0648968		1.08069	5.5039	0.000431452	1.57885
91.0189	8.05757	0.0805758		0.00055129		5.94243	0.0594242	0.000406574	0.0617035	0.000406574		0.314253	0.0594242		1.07779	5.48915	0.00039401	1.5785
94.3121	8.33563	0.0833563		0.000570314		5.66437	0.0566437	0.00038755	0.0629798	0.00038755		0.320753	0.0566437		1.07652	5.48265	0.000375129	1.54274
98.6935	8.65594	0.0865594		0.000592229		5.34406	0.0534406	0.000365635	0.0645818	0.000365635		0.328912	0.0534406		1.07491	5.4745	0.00035339	1.4994
106.938	9.24412	0.0924412		0.000632472		4.75588	0.0475588	0.000325392	0.0672644	0.000325392		0.342575	0.0475588		1.07223	5.46083	0.00031371	1.36473
113.28	9.69946	0.0969946		0.000663626		4.30054	0.0430054	0.000294238	0.0691305	0.000294238		0.352079	0.0430054		1.07037	5.45133	0.000283181	1.22266
122.299	10.1115	0.101115		0.000691819		3.88847	0.0388847	0.000266045	0.07153	0.000266045		0.364299	0.0388847		1.06797	5.43911	0.000255473	1.11765		k1	0.00060396							Initial CaO conc		wt%	10
129.011	10.4814	0.104814		0.000717128		3.51857	0.0351857	0.000240737	0.0731457	0.000240737		0.372528	0.0351857		1.06635	5.43088	0.000230821	0.983258		k2	0.00060396									Mixture mass	639	g
137.621	10.7994	0.107994		0.000738883		3.20059	0.0320059	0.000218981	0.0750311	0.000218981		0.38213	0.0320059		1.06447	5.42128	0.00020959	0.881919		Initial CaO	5.80341	mol/l								Mass CaO	63.9	g
144.845	11.0369	0.110369		0.000755136		2.96305	0.0296305	0.000202729	0.0764957	0.000202729		0.389589	0.0296305		1.063	5.41382	0.000193767	0.803003												CaO Molar mass	56.0774	g/mol
154.73	11.3281	0.113281		0.000775056		2.6719	0.026719	0.000182808	0.0783028	0.000182808		0.398793	0.026719		1.06119	5.40461	0.000174431	0.701837			0.00120792									Moles CaO	1.1395	moles
164.996	11.6511	0.116511		0.000797158		2.34885	0.0234885	0.000160706	0.0799526	0.000160706		0.407195	0.0234885		1.05954	5.39621	0.000153103	0.578065												Salt height	10	cm
174.036	11.8563	0.118563		0.000811192		2.14374	0.0214374	0.000146672	0.0812784	0.000146672		0.413948	0.0214374		1.05822	5.38946	0.000139558	0.506087												Inner D	5	cm
182.23	12.0131	0.120131		0.000821923		1.9869	0.019869	0.000135941	0.0823923	0.000135941		0.419621	0.019869		1.0571	5.38379	0.000129212	0.452884												Vol of salt	196.35	cm3
191.986	12.1561	0.121561		0.000831705		1.84392	0.0184392	0.000126159	0.0836231	0.000126159		0.425889	0.0184392		1.05587	5.37752	0.000119774	0.407683												CaO conc	5.80341	conc
201.572	12.2816	0.122816		0.00084029		1.71844	0.0171844	0.000117574	0.0847503	0.000117574		0.43163	0.0171844		1.05475	5.37178	0.000111504	0.368407
209.09	12.3992	0.123992		0.000848338		1.60081	0.0160081	0.000109526	0.0855736	0.000109526		0.435823	0.0160081		1.05392	5.36758	0.00010379	0.328933
217.126	12.5121	0.125121		0.000856063		1.48791	0.0148791	0.000101801	0.0863917	0.000101801		0.43999	0.0148791		1.0531	5.36342	9.63954e-05	0.292212
226.573	12.5939	0.125939		0.000861659		1.40612	0.0140612	9.62051e-05	0.0873006	9.62051e-05		0.444618	0.0140612		1.0522	5.35879	9.1018e-05	0.269063
234.934	12.6605	0.126605		0.000866218		1.33948	0.0133948	9.16457e-05	0.0880669	9.16457e-05		0.448521	0.0133948		1.05143	5.35489	8.66413e-05	0.250444
242.917	12.7913	0.127913		0.000875168		1.20868	0.0120868	8.26965e-05	0.088727	8.26965e-05		0.451883	0.0120868		1.05077	5.35153	7.81317e-05	0.208378
252.839	12.7943	0.127943		0.000875374		1.20567	0.0120567	8.24906e-05	0.0895454	8.24906e-05		0.456051	0.0120567		1.04995	5.34736	7.78764e-05	0.212907
260.55	12.8972	0.128972		0.000882411		1.10281	0.0110281	7.5453e-05	0.0901273	7.5453e-05		0.459015	0.0110281		1.04937	5.34439	7.1193e-05	0.181476
269.14	12.9863	0.129863		0.000888507		1.01372	0.0101372	6.93576e-05	0.0907231	6.93576e-05		0.462049	0.0101372		1.04877	5.34136	6.54046e-05	0.156263
277.331	13.0055	0.130055		0.000889819		0.99453	0.0099453	6.80446e-05	0.0912804	6.80446e-05		0.464887	0.0099453		1.04822	5.33852	6.41323e-05	0.15306
285.776	13.0326	0.130326		0.000891677		0.96738	0.0096738	6.6187e-05	0.0918394	6.6187e-05		0.467734	0.0096738		1.04766	5.33567	6.23483e-05	0.14736
293.968	13.093	0.13093		0.000895805		0.90705	0.0090705	6.20593e-05	0.0923478	6.20593e-05		0.470323	0.0090705		1.04715	5.33308	5.84316e-05	0.131603
301.93	13.0938	0.130938		0.000895864		0.90619	0.0090619	6.20005e-05	0.0928414	6.20005e-05		0.472837	0.0090619		1.04666	5.33057	5.83487e-05	0.133356
311.17	13.1741	0.131741		0.000901356		0.82591	0.0082591	5.65078e-05	0.0933636	5.65078e-05		0.475497	0.0082591		1.04613	5.32791	5.3153e-05	0.112547
318.88	13.1925	0.131925		0.000902615		0.80751	0.0080751	5.52489e-05	0.0937895	5.52489e-05		0.477666	0.0080751		1.04571	5.32574	5.19477e-05	0.108981
327.664	13.2577	0.132577		0.00090708		0.74225	0.0074225	5.07839e-05	0.0942356	5.07839e-05		0.479938	0.0074225		1.04526	5.32347	4.77291e-05	0.0933183
336.784	13.3125	0.133125		0.000910829		0.68746	0.0068746	4.70352e-05	0.0946646	4.70352e-05		0.482123	0.0068746		1.04483	5.32129	4.41878e-05	0.0810799
344.892	13.3916	0.133916		0.000916235		0.60844	0.0060844	4.16288e-05	0.0950021	4.16288e-05		0.483842	0.0060844		1.04449	5.31957	3.9096e-05	0.0641501
352.936	13.4021	0.134021		0.000916958		0.59788	0.0059788	4.09063e-05	0.0953311	4.09063e-05		0.485517	0.0059788		1.04417	5.31789	3.84053e-05	0.0625465
361.866	13.4379	0.134379		0.000919407		0.56209	0.0056209	3.84576e-05	0.0956746	3.84576e-05		0.487267	0.0056209		1.04382	5.31614	3.60945e-05	0.0558423
370.227	13.4897	0.134897		0.000922952		0.51027	0.0051027	3.49121e-05	0.0959665	3.49121e-05		0.488753	0.0051027		1.04353	5.31465	3.27577e-05	0.0464145
378.587	13.4873	0.134873		0.000922783		0.51274	0.0051274	3.50811e-05	0.0962597	3.50811e-05		0.490247	0.0051274		1.04324	5.31316	3.2907e-05	0.0472663
387.175	13.4917	0.134917		0.000923087		0.50829	0.0050829	3.47766e-05	0.0965584	3.47766e-05		0.491768	0.0050829		1.04294	5.31164	3.26121e-05	0.0468528
394.927	13.5161	0.135161		0.000924759		0.48386	0.0048386	3.31052e-05	0.096815	3.31052e-05		0.493075	0.0048386		1.04268	5.31033	3.1037e-05	0.0427727
403.667	13.5156	0.135156		0.000924725		0.48436	0.0048436	3.31394e-05	0.0971047	3.31394e-05		0.49455	0.0048436		1.04239	5.30886	3.10604e-05	0.0432192
408.636	13.5351	0.135351		0.000926055		0.46492	0.0046492	3.18093e-05	0.0972627	3.18093e-05		0.495355	0.0046492		1.04223	5.30805	2.98093e-05	0.0400002
411.421	13.0562	0.130562		0.000893291		0.94379	0.0094379	6.4573e-05	0.0974425	6.4573e-05		0.496271	0.0094379		1.04205	5.30714	6.05026e-05
414.388	12.2971	0.122971		0.000841354		1.70289	0.0170289	0.00011651	0.0977883	0.00011651		0.498032	0.0170289		1.04171	5.30538	0.000109129
414.396	12.7098	0.127098		0.000869588		1.29023	0.0129023	8.82761e-05	0.097789	8.82761e-05		0.498035	0.0129023		1.04171	5.30537	8.26839e-05
414.396	12.7098	0.127098		0.000869588		1.29023	0.0129023	8.82761e-05	0.097789	#DIV/0!		0.498035	0.0129023		1.04171	5.30537	8.26839e-05
414.977	11.8904	0.118904		0.000813528		2.1096	0.021096	0.000144336	0.0978728	0.000144336		0.498462	0.021096		1.04162	5.30495	0.000135182
415.525	11.3067	0.113067		0.000773594		2.69326	0.0269326	0.00018427	0.0979737	0.00018427		0.498976	0.0269326		1.04152	5.30443	0.000172566
416.199	13.1442	0.131442		0.000899313		0.85577	0.0085577	5.85508e-05	0.0980133	5.85508e-05		0.499177	0.0085577		1.04148	5.30423	5.48299e-05
418.441	11.1489	0.111489		0.000762797		2.85107	0.0285107	0.000195067	0.0984505	0.000195067		0.501404	0.0285107		1.04105	5.302	0.000182594
421.307	11.6369	0.116369		0.000796181		2.36314	0.0236314	0.000161683	0.0989139	0.000161683		0.503764	0.0236314		1.04058	5.29964	0.000151277
422.478	12.4622	0.124622		0.000852647		1.53783	0.0153783	0.000105217	0.0990371	0.000105217		0.504392	0.0153783		1.04046	5.29902	9.84332e-05
423.641	12.8748	0.128748		0.000880881		1.12517	0.0112517	7.69829e-05	0.0991267	7.69829e-05		0.504848	0.0112517		1.04037	5.29856	7.20135e-05
424.806	13.37	0.1337		0.000914761		0.62999	0.0062999	4.31032e-05	0.0991769	4.31032e-05		0.505104	0.0062999		1.04032	5.2983	4.03189e-05
424.816	13.8652	0.138652		0.000948641		0.1348	0.001348	9.22286e-06	0.099177	9.22286e-06		0.505104	0.001348		1.04032	5.2983	8.6271e-06
425.981	14.3604	0.143604		0.000982522		-0.36039	-0.0036039	-2.46575e-05	0.0991483	-2.46575e-05		0.504958	-0.0036039		1.04035	5.29845	-2.30653e-05
426.237	14.764	0.14764		0.00101014		-0.76399	-0.0076399	-5.22713e-05	0.0991348	-5.22713e-05		0.50489	-0.0076399		1.04036	5.29852	-4.88968e-05
427.155	15.3508	0.153508		0.00105028		-1.35076	-0.0135076	-9.24175e-05	0.09905	-9.24175e-05		0.504458	-0.0135076		1.04045	5.29895	-8.64582e-05
427.524	15.8499	0.158499		0.00108443		-1.84987	-0.0184987	-0.000126566	0.0990032	-0.000126566		0.504219	-0.0184987		1.04049	5.29919	-0.00011841
428.331	16.4237	0.164237		0.00112369		-2.42366	-0.0242366	-0.000165824	0.0988695	-0.000165824		0.503538	-0.0242366		1.04063	5.29987	-0.000155158
428.432	16.9448	0.169448		0.00115934		-2.94479	-0.0294479	-0.000201479	0.0988491	-0.000201479		0.503434	-0.0294479		1.04065	5.29997	-0.000188524
429.846	17.9945	0.179945		0.00123116		-3.99447	-0.0399447	-0.000273297	0.0984628	-0.000273297		0.501467	-0.0399447		1.04103	5.30194	-0.000255819
430.752	19.0351	0.190351		0.00130236		-5.0351	-0.050351	-0.000344496	0.0981504	-0.000344496		0.499876	-0.050351		1.04135	5.30353	-0.000322561
431.143	19.6052	0.196052		0.00134136		-5.60519	-0.0560519	-0.000383501	0.0980005	-0.000383501		0.499112	-0.0560519		1.0415	5.3043	-0.000359134
432.299	20.3925	0.203925		0.00139523		-6.39245	-0.0639245	-0.000437364	0.0974953	-0.000437364		0.496539	-0.0639245		1.042	5.30687	-0.000409773
433.199	21.1037	0.211037		0.00144389		-7.1037	-0.071037	-0.000486027	0.0970577	-0.000486027		0.494311	-0.071037		1.04244	5.3091	-0.000455558
434.488	22.2746	0.222746		0.001524		-8.27463	-0.0827463	-0.000566141	0.0963278	-0.000566141		0.490594	-0.0827463		1.04317	5.31281	-0.000531021
435.383	22.696	0.22696		0.00155284		-8.69601	-0.0869601	-0.000594971	0.0957955	-0.000594971		0.487883	-0.0869601		1.0437	5.31553	-0.000558347
436.154	23.2782	0.232782		0.00159267		-9.27816	-0.0927816	-0.000634801	0.0953059	-0.000634801		0.485389	-0.0927816		1.04419	5.31802	-0.000596005
436.926	23.9215	0.239215		0.00163669		-9.92155	-0.0992155	-0.000678821	0.0947816	-0.000678821		0.482719	-0.0992155		1.04471	5.32069	-0.000637655
437.728	24.5117	0.245117		0.00167706		-10.5117	-0.105117	-0.000719198	0.0942049	-0.000719198		0.479782	-0.105117		1.04529	5.32363	-0.000675956
441.8	24.892	0.24892		0.00170308		-10.892	-0.10892	-0.000745216	0.0911702	-0.000745216		0.464326	-0.10892		1.04833	5.33908	-0.000702443
444.655	24.2641	0.242641		0.00166012		-10.2641	-0.102641	-0.000702258	0.0891657	-0.000702258		0.454117	-0.102641		1.05033	5.34929	-0.000663216
445.801	23.7689	0.237689		0.00162624		-9.76891	-0.0976891	-0.000668378	0.0883999	-0.000668378		0.450217	-0.0976891		1.0511	5.35319	-0.00063168
446.418	23.4872	0.234872		0.00160697		-9.4872	-0.094872	-0.000649103	0.0879993	-0.000649103		0.448177	-0.094872		1.0515	5.35523	-0.000613698
448.082	22.2834	0.222834		0.0015246		-8.28336	-0.0828336	-0.000566738	0.0870559	-0.000566738		0.443372	-0.0828336		1.05244	5.36004	-0.000536306
448.303	22.6999	0.226999		0.0015531		-8.69994	-0.0869994	-0.00059524	0.0869249	-0.00059524		0.442705	-0.0869994		1.05257	5.3607	-0.000563347
449.424	21.7498	0.217498		0.0014881		-7.74979	-0.0774979	-0.000530232	0.0863301	-0.000530232		0.439676	-0.0774979		1.05317	5.36373	-0.000502106
450.549	20.9354	0.209354		0.00143238		-6.93539	-0.0693539	-0.000474511	0.0857966	-0.000474511		0.436959	-0.0693539		1.0537	5.36645	-0.000449569
451.676	20.311	0.20311		0.00138966		-6.31101	-0.0631101	-0.000431792	0.0853096	-0.000431792		0.434478	-0.0631101		1.05419	5.36893	-0.000409284
452.8	19.4559	0.194559		0.00133115		-5.45588	-0.0545588	-0.000373285	0.0848902	-0.000373285		0.432342	-0.0545588		1.05461	5.37107	-0.000353968
453.927	18.7636	0.187636		0.00128379		-4.76363	-0.0476363	-0.000325922	0.084523	-0.000325922		0.430472	-0.0476363		1.05497	5.37294	-0.000309163
455.051	17.9356	0.179357		0.00122714		-3.93565	-0.0393565	-0.000269273	0.0842203	-0.000269273		0.428931	-0.0393565		1.05528	5.37448	-0.0002555
456.554	17.0907	0.170907		0.00116933		-3.09071	-0.0309071	-0.000211463	0.0839023	-0.000211463		0.427311	-0.0309071		1.05559	5.3761	-0.000200707
457.68	16.3204	0.163204		0.00111662		-2.32041	-0.0232041	-0.00015876	0.0837237	-0.00015876		0.426401	-0.0232041		1.05577	5.37701	-0.00015071
459.186	15.5965	0.155965		0.00106709		-1.5965	-0.015965	-0.000109231	0.0835592	-0.000109231		0.425564	-0.015965		1.05594	5.37784	-0.000103709
461.067	14.6475	0.146475		0.00100216		-0.64749	-0.0064749	-4.43005e-05	0.0834758	-4.43005e-05		0.425139	-0.0064749		1.05602	5.37827	-4.20643e-05
462.574	13.9722	0.139722		0.000955963		0.02779	0.0002779	1.90136e-06	0.0834787	1.90136e-06		0.425154	0.0002779		1.05602	5.37825	1.80538e-06
464.121	13.2811	0.132811		0.000908678		0.7189	0.007189	4.91863e-05	0.0835548	4.91863e-05		0.425541	0.007189		1.05594	5.37787	4.67e-05
465.406	12.6972	0.126972		0.000868731		1.30276	0.0130276	8.91334e-05	0.0836693	8.91334e-05		0.426124	0.0130276		1.05583	5.37728	8.46185e-05
466.374	12.2971	0.122971		0.000841354		1.70289	0.0170289	0.00011651	0.0837821	0.00011651		0.426699	0.0170289		1.05571	5.37671	0.000110596
467.853	11.8547	0.118547		0.000811089		2.14525	0.0214525	0.000146776	0.0839992	0.000146776		0.427805	0.0214525		1.0555	5.3756	0.000139297
469.74	11.1534	0.111534		0.000763106		2.84655	0.0284655	0.000194758	0.0843666	0.000194758		0.429676	0.0284655		1.05513	5.37373	0.000184771
470.966	10.8116	0.108116		0.000739714		3.18845	0.0318845	0.00021815	0.0846342	0.00021815		0.431038	0.0318845		1.05486	5.37237	0.000206911
472.762	10.2214
475.03	9.62418
477.676	8.88216
481.082	8.1492
486.573	7.19905
490.172	6.62897
496.237	5.86885
502.873	5.1291
509.131	4.50375
518.047	3.81587
525.069	3.37813
536.078	2.80804
546.16	2.36389
554.177	2.0894
562.563	1.83754
568.735	1.66108
581.497	1.37333
588.359	1.23126
601.347	1.0018
611.659	0.883697
619.931	0.71396
633.693	0.631971
642.051	0.527966
648.674	0.495186
659.071	0.495186
667.128	0.372544
675.486	0.295226
683.846	0.300573
692.205	0.249704
700.565	0.263606
702.085	0.247266
709.151	0.16258
717.282	0.127916
725.64	0.0672329
732.86	0.0300088

## Sheet: 15 wt% 
15wt%		Ideal gas law	mol/min	mol/min				mol/min	Moles CO2	mol/min	0.392699	mol/L	Partial pressure		mol		Oxide concentration
Time (mins)	Co2 vol%	Molar fraction	Total molar flow out	CO2 moles exiting	CO2 entering vol%	Co2 absorbed (vol%)	Molar fraction	Moles being absorbed	Moles in solution	Rate of absorption	Molten salt vol (L)	CO2 concentration	CO2 partial pressure	CaO moles	CaO molar change	O2-	Predicted rate	Error
2.88809	0	0	0.00687406	0	14	14	0.14	0.000962369	0.00277941	0.000962369	0.19635	0.0141554	0.14	1.70924	1.70647	8.69096	0.00100459	17.8262
8.21821	0.135758	0.00135758		9.33211e-06		13.8642	0.138642	0.000953037	0.00785921	0.000953037		0.0400266	0.138642		1.70139	8.66509	0.000991887	15.0934
16.5807	0.272699	0.00272699		1.87455e-05		13.7273	0.137273	0.000943623	0.0157502	0.000943623		0.0802152	0.137273		1.69349	8.6249	0.000977535	11.5
24.9458	0.550695	0.00550695		3.78551e-05		13.4493	0.134493	0.000924514	0.0234839	0.000924514		0.119603	0.134493		1.68576	8.58551	0.000953365	8.32387
33.311	0.82858	0.0082858		5.69571e-05		13.1714	0.131714	0.000905412	0.0310578	0.000905412		0.158176	0.131714		1.67819	8.54694	0.000929472	5.78891
41.676	1.09676	0.0109676		7.53919e-05		12.9032	0.129032	0.000886977	0.0384774	0.000886977		0.195964	0.129032		1.67077	8.50915	0.000906522	3.81991
50.0403	1.33368	0.0133368		9.16778e-05		12.6663	0.126663	0.000870691	0.0457602	0.000870691		0.233055	0.126663		1.66348	8.47206	0.000885998	2.34298
58.4047	1.57191	0.0157191		0.000108054		12.4281	0.124281	0.000854315	0.052906	0.000854315		0.269448	0.124281		1.65634	8.43566	0.000865599	1.2734
66.7697	1.84157	0.0184157		0.000126591		12.1584	0.121584	0.000835778	0.0598973	0.000835778		0.305054	0.121584		1.64935	8.40006	0.000843243	0.557309
75.1334	2.04443	0.0204443		0.000140536		11.9556	0.119556	0.000821833	0.0667708	0.000821833		0.340061	0.119556		1.64247	8.36505	0.000825719	0.150949
83.4973	2.25667	0.0225667		0.000155125		11.7433	0.117433	0.000807244	0.0735225	0.000807244		0.374447	0.117433		1.63572	8.33066	0.000807726	0.00232537
91.8622	2.51868	0.0251868		0.000173136		11.4813	0.114813	0.000789233	0.0801244	0.000789233		0.40807	0.114813		1.62912	8.29704	0.000786517	0.0737561
100.227	2.75807	0.0275807		0.000189591		11.2419	0.112419	0.000772778	0.0865882	0.000772778		0.44099	0.112419		1.62266	8.26412	0.000767063	0.326586
108.592	3.04311	0.0304311		0.000209185		10.9569	0.109569	0.000753184	0.0928888	0.000753184		0.473079	0.109569		1.61636	8.23203	0.000744711	0.71788
116.957	3.29237	0.0329237		0.000226319		10.7076	0.107076	0.00073605	0.0990456	0.00073605		0.504435	0.107076		1.6102	8.20068	0.000724997	1.2215
125.321	3.53916	0.0353916		0.000243284		10.4608	0.104608	0.000719085	0.10506	0.000719085		0.535068	0.104608		1.60418	8.17004	0.000705642	1.80719
133.687	3.85505	0.0385505		0.000264999		10.145	0.10145	0.00069737	0.110895	0.00069737		0.564781	0.10145		1.59835	8.14033	0.000681844	2.41058
142.053	4.17341	0.0417341		0.000286883		9.82659	0.0982659	0.000675486	0.116546	0.000675486		0.593562	0.0982659		1.5927	8.11155	0.000658112	3.01851
150.419	4.49917	0.0449917		0.000309276		9.50083	0.0950083	0.000653093	0.122009	0.000653093		0.621389	0.0950083		1.58724	8.08372	0.000634112	3.60269
158.786	4.88663	0.0488663		0.00033591		9.11337	0.0911337	0.000626459	0.127251	0.000626459		0.648085	0.0911337		1.58199	8.05703	0.000606243	4.08661
167.153	5.26175	0.0526175		0.000361696		8.73825	0.0873825	0.000600673	0.132277	0.000600673		0.673681	0.0873825		1.57697	8.03143	0.000579443	4.50713
175.52	5.63194	0.0563194		0.000387143		8.36806	0.0836806	0.000575226	0.13709	0.000575226		0.698193	0.0836806		1.57215	8.00692	0.000553202	4.85063
183.888	6.04408	0.0604408		0.000415474		7.95592	0.0795592	0.000546895	0.141666	0.000546895		0.7215	0.0795592		1.56758	7.98361	0.000524425	5.04919
192.256	6.45251	0.0645251		0.00044355		7.54749	0.0754749	0.000518819	0.146007	0.000518819		0.74361	0.0754749		1.56324	7.9615	0.000496124	5.15045
200.623	6.85355	0.0685355		0.000471117		7.14645	0.0714645	0.000491252	0.150118	0.000491252		0.764545	0.0714645		1.55913	7.94057	0.000468528	5.1638
208.991	7.28049	0.0728049		0.000500466		6.71951	0.0671951	0.000461903	0.153983	0.000461903		0.78423	0.0671951		1.55526	7.92088	0.000439445	5.04386
217.359	7.71978	0.0771978		0.000530663		6.28022	0.0628022	0.000431706	0.157596	0.000431706		0.802629	0.0628022		1.55165	7.90248	0.000409762	4.81554
225.727	8.11218	0.0811218		0.000557636		5.88782	0.0588782	0.000404733	0.160982	0.000404733		0.819877	0.0588782		1.54826	7.88523	0.000383321	4.5846
234.095	8.53419	0.0853419		0.000586646		5.46581	0.0546581	0.000375723	0.164127	0.000375723		0.835889	0.0546581		1.54512	7.86922	0.000355124	4.24344		k1	0.000412822							Initial CaO conc		wt%	15
242.463	8.95867	0.0895867		0.000615824		5.04133	0.0504133	0.000346544	0.167026	0.000346544		0.850658	0.0504133		1.54222	7.85445	0.00032693	3.84731		k2	0.000412822									Mixture mass	639	g
250.829	9.30911	0.0930911		0.000639914		4.69089	0.0469089	0.000322455	0.169724	0.000322455		0.864398	0.0469089		1.53952	7.84071	0.000303672	3.5281		Initial CaO	8.70511	mol/l								Mass CaO	95.85	g
259.196	9.67436	0.0967436		0.000665022		4.32564	0.0432564	0.000297347	0.172212	0.000297347		0.877069	0.0432564		1.53703	7.82804	0.000279574	3.15887												CaO Molar mass	56.0774	g/mol
267.562	9.98284	0.0998284		0.000686227		4.01716	0.0401716	0.000276142	0.174522	0.000276142		0.888834	0.0401716		1.53472	7.81628	0.000259246	2.85473			0.000825645									Moles CaO	1.70924	moles
275.928	10.3234	0.103234		0.000709638		3.67658	0.0367658	0.00025273	0.176637	0.00025273		0.899603	0.0367658		1.53261	7.80551	0.00023694	2.49336												Salt height	10	cm
284.294	10.6368	0.106368		0.000731183		3.36316	0.0336316	0.000231186	0.178571	0.000231186		0.909453	0.0336316		1.53067	7.79566	0.000216468	2.16614												Inner D	5	cm
292.659	10.8836	0.108836		0.000748148		3.11637	0.0311637	0.000214221	0.180363	0.000214221		0.918579	0.0311637		1.52888	7.78653	0.000200349	1.9245												Vol of salt	196.35	cm3
301.024	11.1798	0.111798		0.000768505		2.82022	0.0282022	0.000193864	0.181984	0.000193864		0.926839	0.0282022		1.52726	7.77827	0.000181117	1.62476												CaO conc	8.70511	conc
309.389	11.4587	0.114587		0.000787675		2.54135	0.0254135	0.000174694	0.183446	0.000174694		0.934281	0.0254135		1.5258	7.77083	0.000163052	1.35545
317.753	11.6832	0.116832		0.000803113		2.31677	0.0231677	0.000159256	0.184778	0.000159256		0.941065	0.0231677		1.52447	7.76405	0.000148513	1.15418
326.116	11.8412	0.118412		0.00081397		2.15883	0.0215883	0.000148399	0.186019	0.000148399		0.947386	0.0215883		1.52323	7.75773	0.000138276	1.02486
334.48	12.046	0.12046		0.00082805		1.95399	0.0195399	0.000134319	0.187142	0.000134319		0.953107	0.0195399		1.5221	7.752	0.000125063	0.856605
342.844	12.2459	0.122459		0.000841792		1.75409	0.0175409	0.000120577	0.188151	0.000120577		0.958243	0.0175409		1.52109	7.74687	0.000112194	0.702718
351.206	12.3767	0.123767		0.000850783		1.62329	0.0162329	0.000111586	0.189084	0.000111586		0.962996	0.0162329		1.52016	7.74212	0.000103765	0.611747
359.568	12.4828	0.124828		0.000858078		1.51717	0.0151717	0.000104291	0.189956	0.000104291		0.967437	0.0151717		1.51929	7.73767	9.69255e-05	0.542542
367.931	12.6309	0.126309		0.000868256		1.3691	0.013691	9.41128e-05	0.190743	9.41128e-05		0.971445	0.013691		1.5185	7.73367	8.74206e-05	0.447854
376.293	12.779	0.12779		0.000878435		1.22102	0.0122102	8.39337e-05	0.191445	8.39337e-05		0.97502	0.0122102		1.5178	7.73009	7.79293e-05	0.360529
384.654	12.8481	0.128481		0.000883185		1.15192	0.0115192	7.91837e-05	0.192107	7.91837e-05		0.978392	0.0115192		1.51714	7.72672	7.3487e-05	0.324521
393.016	12.9641	0.129641		0.000891158		1.03593	0.0103593	7.12105e-05	0.192702	7.12105e-05		0.981425	0.0103593		1.51654	7.72369	6.60615e-05	0.265122
401.377	13.0085	0.130085		0.000894212		0.99151	0.0099151	6.8157e-05	0.193272	6.8157e-05		0.984327	0.0099151		1.51597	7.72078	6.32051e-05	0.24522
409.739	13.1097	0.131097		0.000901168		0.89032	0.0089032	6.12012e-05	0.193784	6.12012e-05		0.986933	0.0089032		1.51546	7.71818	5.67354e-05	0.199429
418.1	13.1615	0.131615		0.00090473		0.8385	0.008385	5.7639e-05	0.194266	5.7639e-05		0.989388	0.008385		1.51498	7.71572	5.34162e-05	0.178322
426.46	13.2035	0.132035		0.000907614		0.79654	0.0079654	5.47547e-05	0.194724	5.47547e-05		0.991719	0.0079654		1.51452	7.71339	5.07278e-05	0.162154
434.821	13.238	0.13238		0.000909989		0.76199	0.0076199	5.23797e-05	0.195161	5.23797e-05		0.993949	0.0076199		1.51408	7.71116	4.85135e-05	0.149475
443.182	13.3022	0.133022		0.0009144		0.69783	0.0069783	4.79693e-05	0.195563	4.79693e-05		0.995992	0.0069783		1.51368	7.70912	4.44168e-05	0.126198
451.542	13.3417	0.133417		0.000917114		0.65834	0.0065834	4.52547e-05	0.195941	4.52547e-05		0.997919	0.0065834		1.5133	7.70719	4.18928e-05	0.113022
459.902	13.3491	0.133491		0.000917623		0.65094	0.0065094	4.4746e-05	0.196315	4.4746e-05		0.999824	0.0065094		1.51293	7.70529	4.14117e-05	0.111177
468.262	13.3157	0.133157		0.000915332		0.68426	0.0068426	4.70365e-05	0.196708	4.70365e-05		1.00183	0.0068426		1.51254	7.70329	4.35202e-05	0.123645
476.623	13.3811	0.133811		0.000919828		0.61886	0.0061886	4.25408e-05	0.197064	4.25408e-05		1.00364	0.0061886		1.51218	7.70147	3.93513e-05	0.101729
484.983	13.4182	0.134182		0.000922373		0.58184	0.0058184	3.99961e-05	0.197398	3.99961e-05		1.00534	0.0058184		1.51185	7.69977	3.69892e-05
492.96	13.2879	0.132879		0.000913415		0.71215	0.0071215	4.89536e-05	0.197789	4.89536e-05		1.00733	0.0071215		1.51146	7.69778	4.52616e-05
498.142	12.7097	0.127097		0.000873674		1.29029	0.0129029	8.86954e-05	0.198248	8.86954e-05		1.00967	0.0129029		1.511	7.69544	8.19812e-05
499.877	12.3796	0.123796		0.000850984		1.62036	0.0162036	0.000111385	0.198442	0.000111385		1.01065	0.0162036		1.5108	7.69446	0.00010294
503.886	12.3419	0.123419		0.000848389		1.65812	0.0165812	0.00011398	0.198899	0.00011398		1.01298	0.0165812		1.51035	7.69213	0.000105307
505.658	12.6272	0.126272		0.000868005		1.37276	0.0137276	9.43644e-05	0.199066	9.43644e-05		1.01383	0.0137276		1.51018	7.69128	8.71739e-05
505.8	13.0513	0.130513		0.000897152		0.94874	0.0094874	6.5217e-05	0.199075	6.5217e-05		1.01388	0.0094874		1.51017	7.69123	6.02471e-05
507.983	13.37	0.1337		0.000919063		0.62999	0.0062999	4.33059e-05	0.19917	4.33059e-05		1.01436	0.0062999		1.51008	7.69075	4.00033e-05
509.311	13.8617	0.138617		0.000952861		0.13832	0.0013832	9.5082e-06	0.199182	9.5082e-06		1.01443	0.0013832		1.51006	7.69069	8.78301e-06
510.848	14.7188	0.147187		0.00101178		-0.71875	-0.0071875	-4.94073e-05	0.199106	-4.94073e-05		1.01404	-0.0071875		1.51014	7.69107	-4.56413e-05
512.38	15.3974	0.153974		0.00105843		-1.39742	-0.0139742	-9.60595e-05	0.198959	-9.60595e-05		1.01329	-0.0139742		1.51029	7.69182	-8.87461e-05
513.535	16.1263	0.161263		0.00110853		-2.12631	-0.0212631	-0.000146164	0.19879	-0.000146164		1.01243	-0.0212631		1.51045	7.69268	-0.000135051
514.69	16.9176	0.169176		0.00116293		-2.91765	-0.0291765	-0.000200561	0.198559	-0.000200561		1.01125	-0.0291765		1.51069	7.69386	-0.000185341
516.379	17.8352	0.178352		0.001226		-3.83521	-0.0383521	-0.000263635	0.198113	-0.000263635		1.00898	-0.0383521		1.51113	7.69613	-0.0002437
517.892	18.7455	0.187455		0.00128858		-4.74554	-0.0474554	-0.000326211	0.19762	-0.000326211		1.00647	-0.0474554		1.51162	7.69864	-0.000301643
519.305	19.7952	0.197952		0.00136074		-5.79522	-0.0579522	-0.000398367	0.197057	-0.000398367		1.0036	-0.0579522		1.51219	7.70151	-0.000368501
520.995	20.7074	0.207074		0.00142344		-6.70735	-0.0670735	-0.000461068	0.196278	-0.000461068		0.999635	-0.0670735		1.51297	7.70548	-0.000426721
523.14	21.6276	0.216276		0.0014867		-7.62763	-0.0762763	-0.000524328	0.195153	-0.000524328		0.993905	-0.0762763		1.51409	7.71121	-0.00048563
524.107	22.5265	0.225265		0.00154849		-8.5265	-0.085265	-0.000586117	0.194586	-0.000586117		0.991018	-0.085265		1.51466	7.71409	-0.000543061
526.518	23.3569	0.233569		0.00160557		-9.35689	-0.0935689	-0.000643199	0.193036	-0.000643199		0.983123	-0.0935689		1.51621	7.72199	-0.00059656
527.747	24.0754	0.240754		0.00165496		-10.0754	-0.100754	-0.000692588	0.192184	-0.000692588		0.978785	-0.100754		1.51706	7.72633	-0.000642729
529.933	24.829	0.24829		0.00170676		-10.829	-0.10829	-0.000744394	0.190557	-0.000744394		0.970498	-0.10829		1.51869	7.73461	-0.000691547
532.335	25.5142	0.255142		0.00175386		-11.5142	-0.115142	-0.000791491	0.188656	-0.000791491		0.960817	-0.115142		1.52059	7.7443	-0.00073622
535.387	26.153	0.26153		0.00179778		-12.153	-0.12153	-0.000835406	0.186106	-0.000835406		0.947831	-0.12153		1.52314	7.75728	-0.000778372
540.787	26.7029	0.267029		0.00183557		-12.7029	-0.127029	-0.000873203	0.181391	-0.000873203		0.923818	-0.127029		1.52785	7.78129	-0.000816107
544.958	25.8816	0.258816		0.00177911		-11.8816	-0.118816	-0.000816745	0.177985	-0.000816745		0.906468	-0.118816		1.53126	7.79864	-0.000765042
547.073	25.2137	0.252137		0.00173321		-11.2137	-0.112137	-0.00077084	0.176354	-0.00077084		0.898164	-0.112137		1.53289	7.80695	-0.000722811
548.277	24.5821	0.245821		0.00168979		-10.5821	-0.105821	-0.000727422	0.175478	-0.000727422		0.893704	-0.105821		1.53377	7.81141	-0.000682488
549.783	23.874	0.23874		0.00164112		-9.87404	-0.0987404	-0.000678748	0.174456	-0.000678748		0.888497	-0.0987404		1.53479	7.81661	-0.000637246
551.288	23.1207	0.231207		0.00158933		-9.12071	-0.0912071	-0.000626963	0.173512	-0.000626963		0.88369	-0.0912071		1.53573	7.82142	-0.00058899
552.793	22.3199	0.223199		0.00153428		-8.31988	-0.0831988	-0.000571914	0.172652	-0.000571914		0.879308	-0.0831988		1.53659	7.8258	-0.000537575
553.992	21.4631	0.214631		0.00147539		-7.46312	-0.0746312	-0.00051302	0.172036	-0.00051302		0.876174	-0.0746312		1.53721	7.82894	-0.00048241
555.803	20.7657	0.207657		0.00142745		-6.76572	-0.0676572	-0.00046508	0.171194	-0.00046508		0.871886	-0.0676572		1.53805	7.83323	-0.00043757
557.612	19.9961	0.199961		0.00137454		-5.9961	-0.059961	-0.000412176	0.170449	-0.000412176		0.868088	-0.059961		1.5388	7.83702	-0.000387984
558.814	19.2784	0.192784		0.00132521		-5.27842	-0.0527842	-0.000362842	0.170012	-0.000362842		0.865866	-0.0527842		1.53923	7.83925	-0.000341642
560.7	18.5419	0.185419		0.00127458		-4.54194	-0.0454194	-0.000312216	0.169424	-0.000312216		0.862868	-0.0454194		1.53982	7.84224	-0.000294086
562.585	17.7456	0.177456		0.00121985		-3.74563	-0.0374563	-0.000257477	0.168938	-0.000257477		0.860396	-0.0374563		1.54031	7.84472	-0.000242603
564.093	17.1212	0.171212		0.00117693		-3.12125	-0.0312125	-0.000214557	0.168615	-0.000214557		0.858748	-0.0312125		1.54063	7.84636	-0.000202204
566.36	16.4724	0.164724		0.00113233		-2.47244	-0.0247244	-0.000169957	0.16823	-0.000169957		0.856786	-0.0247244		1.54102	7.84833	-0.000160212
570.146	15.7558	0.157558		0.00108306		-1.75576	-0.0175576	-0.000120692	0.167773	-0.000120692		0.854459	-0.0175576		1.54147	7.85065	-0.000113806
574.567	15.0898	0.150898		0.00103728		-1.08975	-0.0108975	-7.49101e-05	0.167441	-7.49101e-05		0.852772	-0.0108975		1.5418	7.85234	-7.06511e-05
576.966	14.7459	0.147459		0.00101364		-0.74589	-0.0074589	-5.1273e-05	0.167318	-5.1273e-05		0.852145	-0.0074589		1.54193	7.85297	-4.83617e-05
577.967	14.1012	0.141012		0.000969322		-0.10115	-0.0010115	-6.95312e-06	0.167311	-6.95312e-06		0.85211	-0.0010115		1.54193	7.853	-6.55835e-06
583.398	13.2867	0.132867		0.00091334		0.71325	0.0071325	4.90293e-05	0.167578	4.90293e-05		0.853466	0.0071325		1.54167	7.85165	4.62376e-05
586.428	12.7302	0.127302		0.000875085		1.26976	0.0126976	8.72841e-05	0.167842	8.72841e-05		0.854813	0.0126976		1.5414	7.8503	8.23002e-05
589.836	12.1561	0.121561		0.000835617		1.84392	0.0184392	0.000126752	0.168274	0.000126752		0.857013	0.0184392		1.54097	7.8481	0.000119481
593.625	11.5643	0.115643		0.000794936		2.43572	0.0243572	0.000167433	0.168908	0.000167433		0.860244	0.0243572		1.54034	7.84487	0.000157763
597.414	10.9942	0.109942		0.000755748		3.00581	0.0300581	0.000206621	0.169691	0.000206621		0.864231	0.0300581		1.53955	7.84088	0.00019459
601.582	10.3571	0.103571		0.000711956		3.64286	0.0364286	0.000250413	0.170735	0.000250413		0.869546	0.0364286		1.53851	7.83557	0.000235671
606.51	9.77025	0.0977025		0.000671613		4.22975	0.0422975	0.000290756	0.172168	0.000290756		0.876844	0.0422975		1.53708	7.82827	0.000273384
611.438	9.15514	0.0915514		0.00062933		4.84486	0.0484486	0.000333039	0.173809	0.000333039		0.885203	0.0484486		1.53544	7.81991	0.000312807
616.365	8.4853	0.084853		0.000583285		5.5147	0.055147	0.000379084	0.175677	0.000379084		0.894716	0.055147		1.53357	7.8104	0.000355622
621.294	7.90035	0.0790035		0.000543075		6.09965	0.0609965	0.000419294	0.177744	0.000419294		0.90524	0.0609965		1.5315	7.79987	0.000392813
627.361	7.25063	0.0725063		0.000498413		6.74937	0.0674937	0.000463956	0.180559	0.000463956		0.919577	0.0674937		1.52869	7.78553	0.000433855
635.333	6.85108	0.0685108		0.000470948		7.14892	0.0714892	0.000491421	0.184476	0.000491421		0.939529	0.0714892		1.52477	7.76558	0.000458361
643.309	6.64526	0.0664526		0.000456799		7.35474	0.0735474	0.00050557	0.188509	0.00050557		0.960066	0.0735474		1.52074	7.74505	0.000470311
649.752	5.79129	0.0579129		0.000398097		8.20871	0.0820871	0.000564272	0.192144	0.000564272		0.978583	0.0820871		1.5171	7.72653	0.000523664
656.201	5.20647
664.17	4.62257
672.519	4.09197
680.87	3.61566
689.225	3.38192
697.587	3.46759
705.947	3.47252
714.312	3.79335
719.162	3.05644
719.983	2.28546
722.5	1.42129
723.222	0.74352
730.97	0.565338
739.325	0.329359
747.684	0.255205
756.044	0.267779
764.402	0.190217
772.761	0.160602
781.122	0.224767
789.481	0.145794
798.077	0.278681
804.072	0.162576

## Sheet: 20 wt% 
20wt%		Ideal gas law	mol/min	mol/min				mol/min	Moles CO2	mol/min	0.392699	mol/L	Partial pressure		mol		Oxide concentration
Time (mins)	Co2 vol%	Molar fraction	Total molar flow out	CO2 moles exiting	CO2 entering vol%	Co2 absorbed (vol%)	Molar fraction	Moles being absorbed	Moles in solution	Rate of absorption	Molten salt vol (L)	CO2 concentration	CO2 partial pressure	CaO moles	CaO molar change	O2-	Predicted rate	Error
6.69805	0.125804	0.00227455	0.00684189	1.55622e-05	14	13.8742	0.138742	0.000949257	0.00635817	0.000949257	0.19635	0.0323819	0.138742	2.27899	2.27263	11.5744	0.000991008	17.4314
15.0598	0.227455	0.0052437		3.58768e-05		13.7725	0.137725	0.000942302	0.0142375	0.000942302		0.0725109	0.137725		2.26476	11.5343	0.000980336	14.4661
23.4253	0.52437	0.00779222		5.33135e-05		13.4756	0.134756	0.000921987	0.0219504	0.000921987		0.111792	0.134756		2.25704	11.495	0.000955935	11.5244
31.7901	0.779222	0.0105563		7.22248e-05		13.2208	0.132208	0.000904551	0.0295167	0.000904551		0.150327	0.132208		2.24948	11.4565	0.000934712	9.09725
40.1552	1.05563	0.0128267		8.77591e-05		12.9444	0.129444	0.000885639	0.0369252	0.000885639		0.188058	0.129444		2.24207	11.4188	0.000912156	7.03152
48.5194	1.28267	0.0152716		0.000104487		12.7173	0.127173	0.000870105	0.0442029	0.000870105		0.225124	0.127173		2.23479	11.3817	0.000893248	5.35598
56.8839	1.52716	0.0179468		0.00012279		12.4728	0.124728	0.000853377	0.051341	0.000853377		0.261478	0.124728		2.22765	11.3453	0.000873277	3.96003
65.2489	1.79468	0.0200692		0.000137311		12.2053	0.122053	0.000835074	0.0583264	0.000835074		0.297054	0.122053		2.22067	11.3098	0.000851867	2.82017
73.6127	2.00692	0.0220485		0.000150853		11.9931	0.119931	0.000820553	0.0651894	0.000820553		0.332007	0.119931		2.2138	11.2748	0.000834467	1.93611
81.9764	2.20485	0.024188		0.000165492		11.7952	0.117952	0.000807011	0.0719389	0.000807011		0.366382	0.117952		2.20705	11.2404	0.000818194	1.25051
90.3403	2.4188	0.023934		0.000163754		11.5812	0.115812	0.000792372	0.0785662	0.000792372		0.400135	0.115812		2.20043	11.2067	0.00080094	0.734011
97.6634	2.3934	0.0263601		0.000180353		11.6066	0.116066	0.000794111	0.0843816	0.000794111		0.429752	0.116066		2.19461	11.1771	0.000800575	0.417942
107.773	2.63601	0.0278009		0.00019021		11.364	0.11364	0.000777511	0.0922422	0.000777511		0.469786	0.11364		2.18675	11.137	0.000781033	0.124056
115.463	2.78009	0.0296692		0.000202993		11.2199	0.112199	0.000767654	0.0981451	0.000767654		0.499849	0.112199		2.18085	11.107	0.00076905	0.0194861
123.615	2.96692	0.0300848		0.000205837		11.0331	0.110331	0.000754871	0.104299	0.000754871		0.531189	0.110331		2.17469	11.0756	0.00075411	0.00579366
131.467	3.00848	0.0308935		0.00021137		10.9915	0.109915	0.000752027	0.110204	0.000752027		0.561262	0.109915		2.16879	11.0456	0.000749229	0.0782995
134.179	3.08935	0.0319776		0.000218787		10.9107	0.109107	0.000746494	0.112228	0.000746494		0.571574	0.109107		2.16676	11.0352	0.000743022	0.120541
141.274	3.19776	0.0341		0.000233309		10.8022	0.108022	0.000739077	0.117472	0.000739077		0.598281	0.108022		2.16152	11.0085	0.000733859	0.27225
149.638	3.41	0.0363212		0.000248505		10.59	0.1059	0.000724555	0.123532	0.000724555		0.629145	0.1059		2.15546	10.9777	0.000717423	0.508696
158.002	3.63212	0.0381638		0.000261113		10.3679	0.103679	0.000709359	0.129465	0.000709359		0.659362	0.103679		2.14953	10.9475	0.000700443	0.794963
166.365	3.81638	0.0403233		0.000275887		10.1836	0.101836	0.000696751	0.135293	0.000696751		0.68904	0.101836		2.1437	10.9178	0.000686129	1.12842
174.729	4.03233	0.0426637		0.0002919		9.96767	0.0996767	0.000681977	0.140997	0.000681977		0.71809	0.0996767		2.138	10.8887	0.000669793	1.4846
183.094	4.26637	0.0448848		0.000307096		9.73363	0.0973364	0.000665964	0.146567	0.000665964		0.746459	0.0973364		2.13243	10.8604	0.000652362	1.85026
191.458	4.48848	0.0474843		0.000324882		9.51152	0.0951152	0.000650768	0.15201	0.000650768		0.774181	0.0951152		2.12698	10.8326	0.000635848	2.22582
199.823	4.74843	0.0498288		0.000340923		9.25157	0.0925157	0.000632982	0.157305	0.000632982		0.801147	0.0925157		2.12169	10.8057	0.000616931	2.57636
208.187	4.98288	0.0515316		0.000352574		9.01712	0.0901712	0.000616941	0.162465	0.000616941		0.827428	0.0901712		2.11653	10.7794	0.000599834	2.9264
216.55	5.15316	0.0535471		0.000366363		8.84684	0.0884684	0.00060529	0.167527	0.00060529		0.853209	0.0884684		2.11147	10.7536	0.000587099	3.3092
224.914	5.35471	0.0553404		0.000378633		8.64529	0.0864529	0.000591501	0.172474	0.000591501		0.878404	0.0864529		2.10652	10.7284	0.00057238	3.65613
233.277	5.53404	0.0573312		0.000392254		8.46596	0.0846596	0.000579231	0.177319	0.000579231		0.903076	0.0846596		2.10167	10.7037	0.000559218	4.00534		k1	0.00030856							Initial CaO conc		wt%	20
241.641	5.73312	0.0590916		0.000404298		8.26688	0.0826688	0.00056561	0.182049	0.00056561		0.927169	0.0826688		2.09694	10.6796	0.000544839	4.3147		k2	0.00030856									Mixture mass	639	g
250.004	5.90916	0.0608274		0.000416174		8.09084	0.0809084	0.000553566	0.186679	0.000553566		0.950747	0.0809084		2.09231	10.6561	0.000532059	4.62541		Initial CaO	11.6068	mol/l								Mass CaO	127.8	g
258.367	6.08274	0.0632871		0.000433003		7.91726	0.0791726	0.00054169	0.191209	0.00054169		0.973819	0.0791726		2.08778	10.633	0.000519517	4.91627												CaO Molar mass	56.0774	g/mol
266.731	6.32871	0.0661827		0.000452815		7.67129	0.0767129	0.000524861	0.195599	0.000524861		0.996178	0.0767129		2.08339	10.6106	0.000502319	5.08157			0.00061712									Moles CaO	2.27899	moles
275.097	6.61827	0.0697118		0.00047696		7.38173	0.0738173	0.000505049	0.199824	0.000505049		1.0177	0.0738173		2.07917	10.5891	0.000482378	5.14003												Salt height	10	cm
283.464	6.97118	0.0734137		0.000502288		7.02882	0.0702882	0.000480904	0.203848	0.000480904		1.03819	0.0702882		2.07515	10.5686	0.000458427	5.05197												Inner D	5	cm
291.83	7.34137	0.0771402		0.000527785		6.65863	0.0665863	0.000455576	0.207659	0.000455576		1.0576	0.0665863		2.07133	10.5492	0.000433485	4.87992												Vol of salt	196.35	cm3
300.197	7.71402	0.0804966		0.000550748		6.28598	0.0628598	0.000430079	0.211258	0.000430079		1.07593	0.0628598		2.06774	10.5309	0.000408514	4.65057												CaO conc	11.6068	conc
308.564	8.04966	0.0840915		0.000575344		5.95034	0.0595034	0.000407116	0.214664	0.000407116		1.09327	0.0595034		2.06433	10.5135	0.000386065	4.43132
316.93	8.40915	0.0883511		0.000604488		5.59085	0.0559085	0.00038252	0.217864	0.00038252		1.10957	0.0559085		2.06113	10.4972	0.000362178	4.13769
325.298	8.83511	0.0926954		0.000634211		5.16489	0.0516489	0.000353376	0.220821	0.000353376		1.12463	0.0516489		2.05817	10.4822	0.000334105	3.71393
333.667	9.26954	0.0974428		0.000666693		4.73046	0.0473046	0.000323653	0.22353	0.000323653		1.13843	0.0473046		2.05546	10.4684	0.000305599	3.25919
342.036	9.74428	0.101314		0.00069318		4.25572	0.0425572	0.000291171	0.225967	0.000291171		1.15084	0.0425572		2.05303	10.456	0.000274604	2.74478
350.403	10.1314	0.104353		0.000713971		3.86859	0.0386859	0.000264685	0.228181	0.000264685		1.16212	0.0386859		2.05081	10.4447	0.000249355	2.34996
358.769	10.4353	0.106484		0.000728549		3.56471	0.0356471	0.000243893	0.230222	0.000243893		1.17251	0.0356471		2.04877	10.4343	0.000229539	2.06038
367.132	10.6484	0.109186		0.000747038		3.35164	0.0335164	0.000229315	0.23214	0.000229315		1.18228	0.0335164		2.04685	10.4245	0.000215617	1.87638
375.497	10.9186	0.111913		0.000765695		3.08141	0.0308141	0.000210827	0.233903	0.000210827		1.19126	0.0308141		2.04509	10.4156	0.000198062	1.62932
383.863	11.1913	0.113583		0.000777121		2.80871	0.0280871	0.000192169	0.235511	0.000192169		1.19945	0.0280871		2.04348	10.4074	0.000180392	1.38692
392.226	11.3583	0.115607		0.000790967		2.64171	0.0264171	0.000180743	0.237022	0.000180743		1.20714	0.0264171		2.04197	10.3997	0.000169541	1.25485
400.817	11.5607	0.117951		0.000807008		2.43934	0.0243934	0.000166897	0.238456	0.000166897		1.21445	0.0243934		2.04054	10.3924	0.000156443	1.09282
408.954	11.7951	0.119183		0.000815437		2.20489	0.0220489	0.000150856	0.239684	0.000150856		1.2207	0.0220489		2.03931	10.3861	0.000141322	0.908998
417.126	11.9183	0.121383		0.000830488		2.08169	0.0208169	0.000142427	0.240847	0.000142427		1.22663	0.0208169		2.03815	10.3802	0.000133349	0.824022
425.68	12.1383	0.122731		0.000839709		1.86171	0.0186171	0.000127376	0.241937	0.000127376		1.23218	0.0186171		2.03706	10.3746	0.000119194	0.669461
434.042	12.2731	0.124137		0.000849333		1.72694	0.0172694	0.000118155	0.242925	0.000118155		1.23721	0.0172694		2.03607	10.3696	0.000110512	0.584213
442.405	12.4137	0.125458		0.000858372		1.58627	0.0158627	0.000108531	0.243833	0.000108531		1.24183	0.0158627		2.03516	10.365	0.000101465	0.499288
450.767	12.5458	0.126169		0.000863235		1.45416	0.0145416	9.9492e-05	0.244665	9.9492e-05		1.24607	0.0145416		2.03433	10.3607	9.29764e-05	0.424527
459.128	12.6169	0.127275		0.000870801		1.38308	0.0138308	9.46288e-05	0.245456	9.46288e-05		1.2501	0.0138308		2.03354	10.3567	8.83973e-05	0.388314
467.49	12.7275	0.127708		0.00087376		1.2725	0.012725	8.7063e-05	0.246184	8.7063e-05		1.2538	0.012725		2.03281	10.353	8.13006e-05	0.33205
475.851	12.7707	0.128236		0.000877377		1.22925	0.0122925	8.41039e-05	0.246887	8.41039e-05		1.25739	0.0122925		2.03211	10.3494	7.85102e-05	0.312894
484.621	12.8236	0.129926		0.000888941		1.17639	0.0117639	8.04873e-05	0.247593	8.04873e-05		1.26098	0.0117639		2.0314	10.3458	7.5108e-05	0.289364
492.575	12.9926	0.129315		0.00088476		1.00737	0.0100737	6.89231e-05	0.248141	6.89231e-05		1.26377	0.0100737		2.03085	10.343	6.42994e-05	0.213789
500.933	12.9315	0.13042		0.000892321		1.06848	0.0106848	7.31042e-05	0.248752	7.31042e-05		1.26688	0.0106848		2.03024	10.3399	6.81794e-05	0.242531
509.295	13.042	0.130422		0.000892334		0.95797	0.0095797	6.55432e-05	0.2493	6.55432e-05		1.26968	0.0095797		2.02969	10.3371	6.11113e-05	0.196417
517.655	13.0422	0.131302		0.000898356		0.95778	0.0095778	6.55302e-05	0.249848	6.55302e-05		1.27247	0.0095778		2.02914	10.3343	6.10827e-05	0.197803
526.017	13.1302	0.131648		0.00090072		0.86976	0.0086976	5.9508e-05	0.250346	5.9508e-05		1.275	0.0086976		2.02865	10.3318	5.54556e-05	0.164218
534.377	13.1648	0.131599		0.000900383		0.83521	0.0083521	5.71441e-05	0.250823	5.71441e-05		1.27743	0.0083521		2.02817	10.3294	5.32402e-05	0.152408
542.737	13.1599	0.131788		0.000901677		0.84014	0.0084014	5.74814e-05	0.251304	5.74814e-05		1.27988	0.0084014		2.02769	10.3269	5.35417e-05	0.155211
551.097	13.1788	0.132446		0.00090618		0.82122	0.0082122	5.61869e-05	0.251774	5.61869e-05		1.28227	0.0082122		2.02722	10.3245	5.23239e-05	0.149234
559.458	13.2446	0.129762		0.000887815		0.75541	0.0075541	5.16843e-05	0.252206	5.16843e-05		1.28447	0.0075541		2.02679	10.3223	4.81205e-05	0.127004
566.727	12.9762	0.127474		0.00087216		1.02383	0.0102383	7.00493e-05	0.252715	7.00493e-05		1.28707	0.0102383		2.02628	10.3197	6.52028e-05
571.174	12.7474	0.135569		0.000927545		1.25264	0.0125264	8.57042e-05	0.253096	8.57042e-05		1.28901	0.0125264		2.0259	10.3178	7.97596e-05
574.664	13.5569	0.141128		0.000965581		0.44314	0.0044314	3.03191e-05	0.253202	3.03191e-05		1.28955	0.0044314		2.02579	10.3173	2.82147e-05
576.156	14.1128	0.147785		0.00101113		-0.11279	-0.0011279	-7.71696e-06	0.25319	-7.71696e-06		1.28949	-0.0011279		2.0258	10.3173	-7.18137e-06
577.499	14.7785	0.157911		0.00108041		-0.77847	-0.0077847	-5.3262e-05	0.253119	-5.3262e-05		1.28912	-0.0077847		2.02587	10.3177	-4.95671e-05
580.913	15.7911	0.167385		0.00114523		-1.79105	-0.0179105	-0.000122542	0.252701	-0.000122542		1.28699	-0.0179105		2.02629	10.3198	-0.000114064
582.173	16.7385	0.177972		0.00121766		-2.73848	-0.0273848	-0.000187364	0.252465	-0.000187364		1.28579	-0.0273848		2.02653	10.321	-0.000174422
582.953	17.7972	0.186623		0.00127685		-3.7972	-0.037972	-0.0002598	0.252262	-0.0002598		1.28476	-0.037972		2.02673	10.3221	-0.00024188
584.642	18.6623	0.19379		0.00132589		-4.66229	-0.0466229	-0.000318989	0.251723	-0.000318989		1.28202	-0.0466229		2.02727	10.3248	-0.000297064
584.909	19.379	0.200667		0.00137294		-5.37896	-0.0537896	-0.000368022	0.251625	-0.000368022		1.28151	-0.0537896		2.02737	10.3253	-0.000342744
586.569	20.0667	0.209422		0.00143284		-6.06669	-0.0606669	-0.000415076	0.250936	-0.000415076		1.27801	-0.0606669		2.02806	10.3288	-0.000386698
588.106	20.9422	0.217924		0.00149101		-6.94217	-0.0694217	-0.000474975	0.250206	-0.000474975		1.27429	-0.0694217		2.02879	10.3325	-0.000442661
589.588	21.7924	0.228115		0.00156074		-7.79245	-0.0779245	-0.000533151	0.249416	-0.000533151		1.27026	-0.0779245		2.02958	10.3366	-0.000497072
591.435	22.8115	0.235143		0.00160882		-8.81154	-0.0881154	-0.000602876	0.248302	-0.000602876		1.26459	-0.0881154		2.03069	10.3422	-0.000562387
592.335	23.5143	0.242473		0.00165897		-9.51434	-0.0951434	-0.00065096	0.247716	-0.00065096		1.26161	-0.0951434		2.03128	10.3452	-0.000607417
593.261	24.2473	0.251341		0.00171965		-10.2473	-0.102473	-0.000701109	0.247067	-0.000701109		1.2583	-0.102473		2.03193	10.3485	-0.000654421
594.139	25.1341	0.259521		0.00177562		-11.1341	-0.111341	-0.000761783	0.246398	-0.000761783		1.25489	-0.111341		2.0326	10.3519	-0.000711289
596.182	25.9521	0.266923		0.00182626		-11.9521	-0.119521	-0.000817751	0.244728	-0.000817751		1.24639	-0.119521		2.03427	10.3604	-0.000764174
597.716	26.6923	0.27376		0.00187303		-12.6923	-0.126923	-0.000868395	0.243395	-0.000868395		1.2396	-0.126923		2.0356	10.3672	-0.000812032
599.059	27.376	0.281478		0.00192584		-13.376	-0.13376	-0.00091517	0.242166	-0.00091517		1.23334	-0.13376		2.03683	10.3735	-0.000856287
600.458	28.1478	0.289772		0.00198259		-14.1478	-0.141478	-0.00096798	0.240812	-0.00096798		1.22644	-0.141478		2.03818	10.3804	-0.000906302
603.12	28.9772	0.2969		0.00203135		-14.9772	-0.149772	-0.00102473	0.238084	-0.00102473		1.21255	-0.149772		2.04091	10.3943	-0.000960716
607.274	29.69	0.2858		0.00195541		-15.69	-0.1569	-0.00107349	0.233625	-0.00107349		1.18984	-0.1569		2.04537	10.417	-0.00100863
611.432	28.58	0.27779		0.00190061		-14.58	-0.1458	-0.000997544	0.229477	-0.000997544		1.16872	-0.1458		2.04952	10.4381	-0.000939176
614.565	27.779	0.273742		0.00187291		-13.779	-0.13779	-0.000942743	0.226523	-0.000942743		1.15367	-0.13779		2.05247	10.4531	-0.00088886
617.987	27.3742	0.26621		0.00182138		-13.3742	-0.133742	-0.000915046	0.223393	-0.000915046		1.13773	-0.133742		2.0556	10.4691	-0.000864063
620.134	26.621	0.259828		0.00177771		-12.621	-0.12621	-0.000863513	0.221538	-0.000863513		1.12828	-0.12621		2.05745	10.4785	-0.000816137
622.402	25.9828	0.253943		0.00173745		-11.9828	-0.119828	-0.000819847	0.219679	-0.000819847		1.11882	-0.119828		2.05931	10.488	-0.000775567
624.29	25.3943	0.247658		0.00169445		-11.3943	-0.113943	-0.000779583	0.218207	-0.000779583		1.11132	-0.113943		2.06079	10.4955	-0.000738004
626.178	24.7658	0.240446		0.0016451		-10.7658	-0.107658	-0.000736585	0.216816	-0.000736585		1.10424	-0.107658		2.06218	10.5026	-0.00069777
628.064	24.0446	0.235754		0.001613		-10.0446	-0.100446	-0.000687241	0.21552	-0.000687241		1.09763	-0.100446		2.06347	10.5092	-0.000651435
630.525	23.5754	0.22899		0.00156672		-9.57542	-0.0957542	-0.000655139	0.213908	-0.000655139		1.08942	-0.0957542		2.06509	10.5174	-0.000621492
632.222	22.899	0.222366		0.0015214		-8.89901	-0.0889901	-0.00060886	0.212875	-0.00060886		1.08416	-0.0889901		2.06612	10.5227	-0.000577878
634.11	22.2366	0.215349		0.00147339		-8.23663	-0.0823663	-0.000563541	0.211811	-0.000563541		1.07874	-0.0823663		2.06718	10.5281	-0.00053514
636.702	21.5349	0.209046		0.00143027		-7.53487	-0.0753487	-0.000515527	0.210475	-0.000515527		1.07194	-0.0753487		2.06852	10.5349	-0.000489863
638.644	20.9046	0.203044		0.00138921		-6.90462	-0.0690462	-0.000472406	0.209557	-0.000472406		1.06727	-0.0690462		2.06944	10.5395	-0.000449088
640.912	20.3044	0.196979		0.00134771		-6.30445	-0.0630445	-0.000431343	0.208579	-0.000431343		1.06228	-0.0630445		2.07041	10.5445	-0.000410246
643.506	19.6979	0.190677		0.00130459		-5.69789	-0.0569789	-0.000389843	0.207568	-0.000389843		1.05713	-0.0569789		2.07143	10.5497	-0.000370956
645.448	19.0677	0.184951		0.00126542		-5.06768	-0.0506768	-0.000346725	0.206894	-0.000346725		1.0537	-0.0506768		2.0721	10.5531	-0.000330034
648.325	18.4951	0.178769		0.00122312		-4.49515	-0.0449515	-0.000307553	0.206009	-0.000307553		1.0492	-0.0449515		2.07298	10.5576	-0.000292873
650.365	17.8769	0.172554		0.00118059		-3.8769	-0.038769	-0.000265253	0.205468	-0.000265253		1.04644	-0.038769		2.07352	10.5604	-0.000252658
653.393	17.2554	0.164632		0.00112639		-3.25537	-0.0325537	-0.000222729	0.204794	-0.000222729		1.04301	-0.0325537		2.0742	10.5638	-0.000212222
657.124	16.4632	0.157344		0.00107653		-2.46321	-0.0246321	-0.00016853	0.204165	-0.00016853		1.0398	-0.0246321		2.07483	10.567	-0.000160629
661.344	15.7344	0.151135		0.00103405		-1.73443	-0.0173443	-0.000118668	0.203664	-0.000118668		1.03725	-0.0173443		2.07533	10.5696	-0.000113131
663.232	15.1135	0.145303		0.000994145		-1.11351	-0.0111351	-7.61851e-05	0.203521	-7.61851e-05		1.03652	-0.0111351		2.07547	10.5703	-7.26358e-05
667.02	14.5303	0.139905		0.000957216		-0.53027	-0.0053027	-3.62805e-05	0.203383	-3.62805e-05		1.03582	-0.0053027		2.07561	10.571	-3.45925e-05
670.05	13.9905	0.134109		0.000917556		0.00947	9.47e-05	6.47927e-07	0.203385	6.47927e-07		1.03583	9.47e-05		2.07561	10.571	6.17781e-07
672.952	13.4109
678.764	12.6721
685.594	12.1698
693.183	11.5804
701.54	11.45
709.133	11.0955
716.117	10.6727
716.74	11.4611
717.476	10.1852
718.08	11.985
721.326	12.7894
729.685	12.7645
738.047	12.8752
746.407	12.867
754.768	12.9682
760.845	12.7975
764.633	12.1831
768.422	11.6061
772.21	11.0117
776.759	10.4301
781.687	9.81149
788.137	9.29924
796.494	9.15939
804.854	9.15774
813.213	9.15363
821.573	9.13142
829.93	9.01378
838.285	8.74149
843.98	8.51115
